1 **Systematic surveillance of SARS-CoV-2 reveals dynamics of variant mutagenesis**  
2 **and transmission in a large urban population**

3  
4 Marie-Ming Aynaud<sup>1,8</sup>, Lauren Caldwell<sup>1,8</sup>, Khalid N. Al-Zahrani<sup>1,8</sup>, Seda Barutcu<sup>1</sup>, Kin  
5 Chan<sup>1,7</sup>, Andreea Obersterescu<sup>1</sup>, Abiodun A. Ogunjimi<sup>1</sup>, Min Jin<sup>2</sup>, Kathleen-Rose  
6 Zakoor<sup>1</sup>, Shyam Patel<sup>1,3</sup>, Ron Padilla<sup>1</sup>, Mark Jen<sup>1,7</sup>, Princess Mae Veniegas<sup>4</sup>, Nursrin  
7 Dewsi<sup>4</sup>, Filiam Yonathan<sup>4</sup>, Lucy Zhang<sup>4</sup>, Amelia Ayson-Fortunato<sup>4</sup>, Analiza Aquino<sup>4</sup>, Paul  
8 Krzyzanowski<sup>5</sup>, Jared Simpson<sup>5</sup>, John Bartlett<sup>5</sup>, Ilinca Lungu<sup>5</sup>, Bradly G. Wouters<sup>6</sup>, James  
9 M. Rini<sup>2</sup>, Michael Gekas<sup>4</sup>, Susan Poutanen<sup>4</sup>, Laurence Pelletier<sup>1,3</sup>, Tony Mazzulli<sup>4,7</sup>, and  
10 Jeffrey L. Wrana<sup>1,3,7\*</sup>

11  
12 **Authors affiliation**

13 <sup>1</sup>Lunenfeld-Tanenbaum Research Institute, Mount Sinai Hospital, Toronto, Ontario, M5G  
14 1X5, Canada.

15 <sup>2</sup>Departments of Molecular Genetics and Biochemistry, University of Toronto, MaRS  
16 Center, Toronto, Ontario, M5G 1M1, Canada

17 <sup>3</sup>Department of Molecular Genetics, Donnelly Centre, University of Toronto, Toronto,  
18 Ontario, M5S 3E1, Canada.

19 <sup>4</sup>Department of Microbiology, Mount Sinai Hospital/University Health Network, Toronto,  
20 Ontario, M5G 1X5, Canada.

21 <sup>5</sup>Ontario Institute for Cancer Research, Toronto General Hospital, Toronto, ON M5G 0A3

22 <sup>6</sup>Princess Margaret Cancer Centre and Campbell Family Institute for Cancer Research,  
23 University Health Network, Toronto, Ontario, M5G 2C4, Canada

24 <sup>7</sup>The Network Biology Collaborative Centre (NBCC), Mount Sinai Hospital, Toronto,  
25 Ontario, M5G 1X5, Canada.

26 <sup>8</sup>These authors contributed equally

27 **\*Corresponding author:** Dr. Jeffrey L. Wrana, [wrana@lunenfeld.ca](mailto:wrana@lunenfeld.ca)

28

29

30 **Abstract**

31 Highly mutable pathogens generate viral diversity that impacts virulence, transmissibility,  
32 treatment, and thwarts acquired immunity. We previously described C19-SPAR-Seq, a  
33 high-throughput, next-generation sequencing platform to detect SARS-CoV-2 that we  
34 deployed to systematically profile variant dynamics of SARS-CoV-2 for over 3 years in a  
35 large, North American urban environment (Toronto, Canada). Sequencing of the ACE2  
36 receptor binding motif and polybasic furin cleavage site of Spike in over 70,000 patients  
37 revealed that population sweeps of canonical variants of concern (VOCs) occurred in  
38 repeating wavelets. Furthermore, we found that subvariants and putative quasi-species  
39 with alterations characteristic of future VOCs and/or predicted to be functionally important  
40 arose frequently, but always extinguished. Systematic screening of functionally relevant  
41 domains in pathogens could thus provide a powerful tool for monitoring spread and  
42 mutational trajectories, particularly those with zoonotic potential.

43

## 44 **Introduction**

45 Repeated outbreaks of respiratory viral infections over the past 20 years culminated in  
46 the COVID-19 pandemic caused by SARS-CoV-2<sup>1</sup>, with more than 700 million cases and  
47 over 7 million deaths confirmed worldwide<sup>2</sup>. SARS-CoV-2 thus presented unique  
48 challenges for public health agencies trying to manage both travel and local spread. In  
49 particular, long incubation and recovery times coupled with large numbers of  
50 asymptomatic/mildly symptomatic patients that unknowingly communicate disease drove  
51 the pandemic to unprecedented levels.

52  
53 The RNA SARS-CoV-2 virus is a member of the coronavirus family characterized by high  
54 mutational rates that lead to genetic diversity. The main variants impacting  
55 transmissibility, severity, and/or immunity are classified as Variants of Concern (VOCs).  
56 The first VOC, Alpha (B.1.1.7) was identified in September 2020 in the United Kingdom<sup>3</sup>,  
57 <sup>4</sup>, followed by the identification of other VOCs that arose in a variety of regions including  
58 Beta (B.1.351) in South Africa in May 2020<sup>5</sup>, Gamma (P.1) in Brazil in November 2020<sup>6</sup>,  
59 Delta (B.1.617.2) in India in October 2020<sup>2</sup>, and Omicron (B.1.1.529) arising in various  
60 countries in November 2021<sup>2</sup>. The continuous process of genetic variation, competition,  
61 and selection results in the detection of major and minor subvariants within these VOCs<sup>7</sup>,  
62 <sup>8</sup>. The equilibrium-like status of a given VOC collapses when an advantageous new  
63 mutant emerges and outcompetes the pre-existing VOC within the population.

64  
65 As the scale of SARS-CoV-2 transmission spiralled, the capacity of whole genome  
66 approaches to systematically map genetic alterations at a population scale was quickly

67 overwhelmed, financially unsustainable, and slow, making it difficult to track emerging  
68 new variants until they had already escaped into broader regional and then global  
69 populations. We previously developed C19-SPAR-Seq (COVID-19 screening using  
70 Systematic Parallel Analysis of RNA coupled to Sequencing)<sup>9</sup> as a high throughput next-  
71 generation sequencing (NGS)-based strategy to enable rapid detection of SARS-CoV-2.  
72 Therefore, as variants began emerging in the Fall of 2020, we pivoted the application of  
73 C19-SPAR-Seq to mapping the evolutionary dynamics of two key functional regions of  
74 SARS-CoV-2 in a large North American urban center. Here, we describe optimization and  
75 automation of the C19-SPAR-Seq pipeline and describe its use in providing near real-  
76 time profiling of 73,510 SARS-CoV-2-positive patients collected within the Greater  
77 Toronto Area (GTA; ~6M people) from December 2020 to March 2023. This screening  
78 effort identified the early emergence of VOCs and revealed repeated acceleration and  
79 deceleration phases of VOC transmission that were unrelated to non-pharmaceutical  
80 interventions (NPIs). Furthermore, we show that subvariants frequently arise within VOC  
81 populations, but never spread, and that by tracking subvariants and minor putative viral  
82 quasispecies, alterations that foreshadowed future evolutionary SARS-CoV-2 trajectories  
83 could be revealed. Systematic profiling of functional domains in highly mutable viruses  
84 could thus provide an important tool to prevent and manage future pandemics.

85

86

87

88

89

## 90 Results

### 91 Integration of C19-SPAR-Seq into a Clinical Pipeline.

92 We previously established a C19-SPAR-Seq platform for high throughput detection of  
93 SARS-CoV-2<sup>9</sup> in which amplicons were designed over the RNA-dependent RNA  
94 polymerase (*RdRP*), and two key functional regions of the Spike (*S*) gene: the receptor-  
95 binding motif (*S-Rbm*) and the furin cleavage site (*S-Pbs*, FCS). In light of the global  
96 emergence of SARS-CoV-2 VOCs in the fall of 2020<sup>5, 6, 10</sup>, we set out to link C19-SPAR-  
97 Seq into a clinical diagnostics pipeline (Clinical Diagnostics Lab, Department of  
98 Microbiology at Mount Sinai Hospital and University Health Network) that provided  
99 COVID19 diagnostics services to the Greater Toronto Area (GTA) (**Fig. 1a**,  
100 **Supplementary Fig. 1, Supplementary Table 1**). Starting in December 2020 we profiled  
101 1,218 SARS-CoV-2 positive samples collected between December 17, 2020, and  
102 January 28, 2021, then subsampled an average of 111 positive samples per week  
103 between January 28, 2021 and May 19, 2021, prior to transitioning to testing all positive  
104 samples in June 2021 (**Fig. 1a; Supplementary Fig. 1**). Importantly, we did not pre-select  
105 samples based on  $C_T$  values from the initial qRT-PCR tests, but established several  
106 quality control cutoffs: 1) total read counts for each amplicon within a given sample were  
107 required to be greater than that of the negative control within each plate; 2) read counts  
108 for *S-Rbm* had to be greater than two times the absolute deviation above the median  
109 counts for *S-Rbm* within each plate; and 3) samples with low viral-reads were filtered out  
110 if a sample's total viral counts were lower than the total viral counts of the negative control  
111 within each plate. Of the initial 1,218 samples, only 20 failed to pass our quality control  
112 filters, representing less than 2% of the samples (**Supplementary Table 2**). Importantly,

113 the remaining 98% of samples showed a high proportion of reads for all four amplicons  
114 (**Fig. 1b**). To call variants in C19-SPAR-Seq data, we analyzed the top read count for  
115 each amplicon following deep sequencing, and first focused on the major VOCs  
116 highlighted by the WHO<sup>11</sup> that circulated in the global population in early 2021. This  
117 showed that most of the samples had *S-Rbm* and *S-Pbs* sequences from the original  
118 Wuhan strain (hereafter referred to as “wild type”, WT). However, we also identified the  
119 first cases of the WHO-designated variants of concern (VOCs), Alpha and Beta, detected  
120 in the GTA (**Fig. 1c,d**) which we confirmed by whole genome sequencing (WGS)  
121 (**Supplementary Table 3**). Together, this pilot analysis of the first 1,218 patients validated  
122 the C19-SPAR-Seq pipeline as an effective, scalable tool to accurately identify mutations  
123 within two key functional domains of SARS-CoV-2-positive patient samples. Of note,  
124 almost all VOCs that emerged between 2020 and 2023 were distinguishable based on  
125 sequence variations in the *S-Rbm* and *S-Pbs* regions targeted by C19-SPAR-Seq version  
126 1 (V1, **Supplementary Fig. 1b**).

127

## 128 **Optimization of an improved C19-SPAR-Seq V2 pipeline**

129 Having benchmarked the C19-SPAR-Seq V1 pipeline, and to facilitate its integration into  
130 a clinical diagnostics platform, we next developed a semi-automated pipeline for the rapid,  
131 systematic screening of SARS-CoV-2 variants (**Supplementary Fig. 2**) that included  
132 semi-automated library generation, sequence processing, and variant assignment.  
133 Briefly, PCR-positive samples were arrayed in 384-well formatted plates, processed,  
134 sequenced, analyzed, and a report generated with the pipeline providing the capacity for  
135 variant profiling within 24h (**Supplementary Fig. 2**). This pipeline was applied to profile

136 an average of 111 cases per week in early 2021 and was accelerated on June 1, 2021 to  
137 include all positive samples and daily screening by the summer of 2021, as increasing  
138 numbers of VOCs were being detected globally, and the more aggressive Delta variant  
139 had emerged (**Fig. 1e**). During the course of variant monitoring from December 17, 2020,  
140 to March 27, 2023, a total of 2,786,028 PCR tests were performed of which 133,089  
141 (4.88%) were SARS-CoV-2-positive, and less than 0.05% of tests were indeterminate  
142 (**Fig. 1f**). Over the course of our analysis, we ran 73,510 of the 137,193 SARS-CoV-2-  
143 positive samples through the C19-SPAR-Seq platform; this represents 53.58% of all  
144 positive cases, with 81.48% profiled after June 1, 2021 (**Fig. 1f**). Importantly, we found  
145 that only 7,345 samples failed QC assessment despite not filtering for viral load (*ie*-Ct  
146 values). This represented a failure rate of ~10% over the test period, showing that C19-  
147 SPAR-Seq can provide robust coverage of variants in a clinical diagnostic setting  
148 (**Supplementary Table 2**).

149  
150 Over the course of screening we also tracked the analytical performance of our pipeline  
151 on a run-to-run basis and adjusted parameters to improve our standard operating  
152 procedures as necessary (see Methods). For example, while the *S-Rbm* and *S-Pbs*  
153 regions produced fingerprints that covered most VOCs, including most Omicron family  
154 members (see below), this was not the case for Delta. Although Delta harbours a P681R  
155 alteration in the *S-Pbs* that was captured, the *S-Rbm* region originally screened was WT,  
156 and the characteristic T478K mutation in the *S-Rbm* was not covered (**Supplementary**  
157 **Fig. 1b**). When Delta emerged as a global threat, we rationalized that our pipeline was  
158 amenable to changes in primer sequences that would capture new regions of interest,



159 and designed a new primer pair (*S-Rbm* V2 and pipeline version V2) which yields a larger  
160 amplicon (**Supplementary Fig. 3a**) that covers an additional five amino acids (including  
161 T478) that contribute to ACE2 receptor binding<sup>12, 13</sup>. We validated that the *S-Rbm* V2  
162 primer pair performed well in our C19-SPAR-Seq assay by qRT-PCR (**Supplementary**  
163 **Fig. 3a**) and multiplexed amplicon distribution by fragment analyzer (**Supplementary Fig.**  
164 **3b; right panel**). One limitation of the V1 primer mixture was the high level of non-specific  
165 amplification that was observed in the multiplex primer reaction (**Supplementary Fig. 3b;**  
166 **left panel**), which required a size selection purification step using the Pippin Prep System  
167 to purify the 220-350 bp fragment window prior to sequencing. However, the V2 primer  
168 mixture that increased the *S-Rbm* amplicon by 35 bp, provided more specific amplification  
169 products from the multiplex reaction (**Supplementary Fig. 3b; right panel**), obviating the  
170 need for a size selection step. Systematic mapping of primer combinations could thus  
171 improve technical performance in future iterations of C19-SPAR-Seq. Next, we validated  
172 V2 against V1 in a diagnostic setting in four clinical runs, which contained a total of 94  
173 samples. Comparison of both V1 and V2 in our C19-SPAR-Seq pipeline showed good  
174 correlation of *S-Rbm* reads (Spearman Correlation of 0.82,  $r^2=0.67$ ; **Supplementary Fig.**  
175 **3c**) without affecting the efficiency of the other primer sets (**Supplementary Fig. 4**). Most  
176 importantly, mutation and variant calling was the same for each of the samples, but with  
177 the added benefit that V2 provided direct sequence information around the T478K  
178 mutation found in Delta (**Supplementary Data 2**).

179  
180 Another potentially confounding factor in large-scale sequencing experiments is the risk  
181 of sample mixing and/or crosswell contamination during the experimental setup and

182 workflow. To directly measure cross-well contamination rates in the PCR step we  
183 developed *S-Rbm V2* primer pairs that incorporated well-specific molecular identifiers  
184 (barcodes; BC-*S-Rbm V2*) (**Supplementary Fig. 5a, Supplementary Table 4**). The 384  
185 BC-*S-Rbm V2* primer pairs were validated by qPCR on a control sample (data not shown)  
186 and were employed to re-analyze 6 clinical runs (1,987 positive samples) across the  
187 testing window that contained a representative mixture of WT, Alpha, Delta, and Omicron  
188 B.1.1.529 VOCs. Of note, BC-*S-Rbm V2* primers did not negatively affect library quality  
189 (**Supplementary Fig. 5b**). We then measured contamination in each well as the  
190 percentage of reads that do not contain the correct barcode pair. Across all these  
191 barcoded clinical runs, we observed that 97% of all reads belonged to the correct well-  
192 barcode pair (**Supplementary Fig. 5c, Supplementary Data 1**). Importantly, samples  
193 which contain a low percentage of correct well-barcode pairs all contained extremely low  
194 total read counts, indicative of a failed PCR reaction. Therefore, these samples would  
195 later be filtered out for having poor quality in the analysis pipeline (**Supplementary Fig**  
196 **6**). In addition, we measured how often paired well-barcodes within a plate were found in  
197 the incorrect well. This revealed that on average 2.5% of the total reads for any given  
198 sample could be attributed to cross-well contamination (**Supplementary Fig. 5d**).  
199 Importantly, mapping the spread of well-barcode mixing events revealed a stochastic  
200 pattern of contamination across six independent clinical runs, indicating that there is not  
201 a systematic error within our robotics pipeline and sample handling (**Supplementary Fig.**  
202 **7**). Together, these studies show that the C19-SPAR-Seq pipeline is highly sensitive,  
203 accurate, robust and adaptable to rapid modifications in the primer multiplexing step,

204 which is extremely advantageous when characterizing highly infectious and mutable  
205 viruses such as C19-SARS-CoV-2.

206

### 207 **Population-level surveillance of variant dynamics by C19-SPAR-Seq.**

208 To track variant spread, we next integrated sequence information into a single dataset  
209 (See methods). Each major VOC was detected within our jurisdiction, albeit with different  
210 latencies from the first emergence worldwide (**Supplementary Table 5**). Of the VOCs  
211 identified in the GTA, only Alpha, Delta, and four Omicron sublineages generated  
212 dominant waves (**Fig. 2, upper panel**). Of the dominant VOCs, we noted that only a  
213 single variant was dominant at any time, as noted in other jurisdictions (**Fig. 2, lower**  
214 **panel**)<sup>14, 15</sup>. We next assessed the transition between variants by calculating the cross-  
215 over point when each subsequent dominant VOC became proportionally more of the  
216 tracked cases than the previous dominant VOC (**Fig. 2, lower panel**).

217

218 This showed a shift from WT to Alpha in late February 2021, from Alpha to Delta in June  
219 2021, and Delta to Omicron B.1.1.529 in December 2021. As expected, Omicron  
220 numbers and frequency dominated the population of variants by late December 2021,  
221 with subsequent Omicron subvariants emerging with their first reported cases on  
222 December 23, 2021 (BA.2/3), May 6, 2022 (BA.4/5), November 16, 2022 (XBB), and  
223 December 8, 2022 (XBB.1.5) (**Fig. 2, upper panel, Supplementary Table 5**). In contrast  
224 to these major VOCs, the Beta and Gamma variants displayed low steady-state infectivity  
225 of <10% in the Spring of 2021, before extinguishing on August 7, 2021, and we grouped  
226 them together for our analyses (**Fig. 2**). Furthermore, Mu (B.1.621.1), which arose in

227 Columbia in January 2021 was only detected in 89 samples, peaking in August 2021,  
228 while Eta (B.1.525) which arose in the United Kingdom and Nigeria in December 2020  
229 was only detected in 3 samples (**Fig. 2, upper panel**). Given their low frequency these  
230 latter two were not further characterized in this study.

231  
232 We postulated that the unique sequences of variants, combined with systematic, high  
233 frequency screening, would provide a sensitive method to track the dynamics of SARS-  
234 CoV-2 spread within the population. To examine this, we first focused on Alpha, the first  
235 major VOC that circulated in the GTA and tracked its emergence and expansion based  
236 on the proportion of daily cases from February 6, 2021 (Day 1), until Alpha became the  
237 dominant species (>50%; Day 32; March 10, 2021; **Fig. 3a**). We next fit linear models  
238 along a sliding 5-day window (**Fig. 3a, top panel, red lines**) to quantify the expansion  
239 rate (Fig. 3a, bottom panel, see methods for details). This showed expansion rates were  
240 low in the beginning indicating a lag-phase in variant expansion. Interestingly, we  
241 observed that Alpha did not expand at a homogeneous rate within the population, but  
242 displayed distinct waves of accelerating and decelerating transmission (**Fig. 3a, lower**  
243 **panel**). Analysis of the emergence of Delta (**Fig. 3b**) similarly showed highly dynamic  
244 behaviour and acceleration/deceleration waves analogous to Alpha dynamics (**Fig. 3b,**  
245 **lower panel**). This was followed by the emergence of Omicron, which displayed a lag  
246 and then two phases of rapid acceleration (**Fig. 3c**). These data show that viral spread is  
247 comprised of multiple, repeated wavelets of transmission.

248

249 The distinct patterns of viral spread prompted us to explore whether acceleration waves  
250 were linked to NPIs. We therefore assessed major NPI policies implemented in the GTA  
251 in 2021, in particular, stay-at-home orders and school openings and closings  
252 (**Supplementary Table 6**). We overlaid NPI dates on our rate of change data for WT and  
253 the three major VOCs (**Fig. 3d**) and found that changes in NPI policies were not  
254 associated with alterations in the patterns of viral expansion. For example, between a  
255 closing NPI (#4; return to stay-at-home order) and an opening NPI (#5; stay-at-home  
256 order lifted), we noted 2 acceleration waves of Alpha, while the opening NPI (#5) was  
257 followed by a mixed period of reduced rates of transmission. Similarly, Delta cases were  
258 initially dynamic until July 2021, but transitioned to a steady-state rate of transmission  
259 despite societal-wide reopening that included the lifting of restrictions on gatherings (#13  
260 to #14, August to September 2021; **Fig 3d, Supplementary Table 6**). Finally, the rapid  
261 onset of Omicron, as initially observed (**Fig. 2 upper panel**) showed an extreme  
262 acceleration and attempts to dampen Omicron spread by restricting travel (#15, **Fig. 3d**)  
263 were followed by a rapid acceleration phase. Indeed, systematic, rapid C19-SPAR-Seq  
264 screening showed substantive numbers of Omicron were already present in the GTA.  
265 These analyses indicate that patterns of viral spread are not strongly affected by NPIs  
266 and further suggest how near real-time monitoring of viral species can provide an  
267 important tool to inform decisions around the introduction of public health measure  
268 policies.

269  
270 In December 2021, changes in provincial government policy that took effect on December  
271 31, 2021 (#17, **Fig. 3d**), limited testing to high risk groups such as patients and staff in

272 health care settings, or people living in or working in First Nation, Inuit, and Métis  
273 communities<sup>16</sup>, and significantly reduced population testing. Thus, subsequent  
274 frequencies may not reflect alterations in the general GTA population. This reduction in  
275 testing accessibility also had an immediate impact on our data collection. The total  
276 samples collected and sequenced between December 25 and December 31, 2021 was  
277 6,813, while in the week immediately after testing restrictions (January 1 to January 7,  
278 2022), only 1,035 samples were collected and processed, marking an 84% drop in  
279 samples. Due to the reduction in population-level data collection, we did not assess the  
280 impact of NPIs implemented after December 2021.

281

## 282 **Subvariants arise frequently in VOC populations**

283 In the course of profiling known variant fingerprints, we noted that subvariants often arose  
284 with additional changes to the *S-Rbm* and/or *S-Pbs* sequences. For example, our  
285 preliminary screen of the first 1,219 samples revealed 3 VOCs with WT comprising 1,142  
286 of the samples, Alpha (B.1.1.7) comprising 6, and Beta (B.1.351) comprising 1. Within  
287 this group we noted 46 WT samples that possessed 12 distinct patterns of alterations in  
288 the *S-Rbm* and *S-Pbs* (**Fig. 4a**). Three were mutations in *S-Rbm* (E484K, Y489Y, and  
289 S494P), eight had mutations in the *S-Pbs* (N679K, P681H, P681H/S691S, P681R,  
290 R682R, A684V, S691S, and I692I), and one had mutations in both regions  
291 (E484K/Q677H) (**Fig. 4a**). In contrast, analysis of the *RdRP* region that is also  
292 incorporated into the C19-SPAR-Seq amplicon set revealed 3 samples each with a  
293 unique variant sequence (**Fig. 4a**). To validate the C19-SPAR-Seq results in the pilot  
294 cohort, we confirmed the presence of these mutations by WGS (**Supplementary Table**

295 3), which showed these early variants all comprised the B strain and further showed that  
296 samples harbouring N679K alterations were closely related (**Fig. 4b**), suggesting they  
297 represent a small transmission cluster. In contrast, the other variants were more distant  
298 and may represent sporadic introductions and/or *de novo* emergence of alterations.

299  
300 We next expanded our analysis and annotated the *S-Rbm* and *S-Pbs* of all SARS-CoV-  
301 2 isolates profiled in the GTA from January 2021-March 2023 (66,165 QC-passing  
302 samples). The WT and canonical VOCs accounted for 96.09% of all samples, with the  
303 remaining 3.91% of samples containing additional changes in the *S-Rbm* and/or *S-Pbs*  
304 (**Supplementary Fig. 8, 9, Supplementary Data 3**). In total we identified 393 non-  
305 canonical, unique alterations in VOCs, the vast majority of which (389 out of the 393  
306 identified) were point mutations that changed the amino acid sequence (**Figure 4c,**  
307 **Supplementary Fig. 8, Supplementary Fig. 9d, Supplementary Data 3**), while the  
308 remaining 4 subvariants were an insertion and deletion in the *S-Pbs* (**Supplementary**  
309 **Fig. 10a**) and 2 silent mutations in BA.4/5 and BA.2.75.2 respectively. To identify these  
310 viral species and their dynamics within the population we next plotted each unique  
311 sequence throughout the time course (**Fig. 4c**) and referred to these as VOC subvariants  
312 (**Fig. 4c, Supplementary Fig. 8, Supplementary Data 3**). To assess if these mutational  
313 calls reflected poor-quality samples, we quantified the top read count percentages, which  
314 showed similar abundance for both canonical VOC and VOC subvariants across the  
315 entire dataset (Supplementary Fig. 10b). We also analyzed *RdRP* and only found 38  
316 nucleotide variants, which formed 34 unique amino acid variants distributed in 194  
317 samples (0.29%; **Supplementary Data 3**). This indicates that, unlike the *RdRP*, the *S-*

318 *Rbm* and *S-Pbs* regions are subject to much greater mutational dynamics  
319 (Supplementary Fig. 9d), an observation consistent with evolutionary pressure  
320 converging on these key functional regions for SARS-CoV-2 transmission and virulence,  
321 and the fact that they are also primary targets of the immune system. In contrast to point  
322 mutants, we only identified five unique stop-gain mutations, which would be predicted to  
323 be disadvantageous for viral expansion (**Supplementary Data 3**). Similarly, while point  
324 mutations in the *S-Pbs* were frequently observed, we identified only 1 example of an  
325 insertion (seen in three samples), and one example of a deletion seen in two samples  
326 (**Supplementary Fig. 10a**). Thus, deletions and insertions within the *S-Rbm* and *S-Pbs*  
327 are extremely rare (**Supplementary Data 3**).

328  
329 The dynamics of canonical VOCs within our data set shares the same patterns as those  
330 worldwide, where each subsequent VOC outcompetes the previous one (**Fig. 2**).  
331 However, we were curious as to how VOC subvariants behaved over time within the  
332 population. To determine this, we aggregated all subvariants for each unique VOC and  
333 plotted their frequencies within the population over time with respect to the canonical  
334 VOC. Interestingly, VOC subvariant frequencies peaked weeks after the peak of the  
335 canonical parental counterpart (**Fig. 4d**), suggesting that these subvariants arose within  
336 the population after the introduction of the canonical version. Interestingly, Delta and  
337 Omicron, which were two of the most dominant VOCs worldwide, had subvariants that  
338 formed secondary waves that peaked while the canonical variant was declining (**Fig. 4d**).  
339



340 We next sought to map how specific mutations and/or residues within the *S-Rbm* or *S-*  
341 *Pbs* were being selected for, or recurrently altered over time. To investigate this, we  
342 calculated the frequency of mutations at each residue within the *S-Rbm* and *S-Pbs*  
343 amplicons for each VOC (**Fig. 5a**). One of the most striking observations was the high  
344 level of mutagenicity of the WT strain at positions E484, N501, N679, and P681, which  
345 together accounted for 79.3% of the WT VOC subvariants (**Fig. 5b, Supplementary Fig.**  
346 **9b,c**). All of these residues were targeted for mutation in future VOCs, suggesting the WT  
347 virus was frequently generating variants in these functionally important residues.  
348 Furthermore, analysis of subvariant frequency showed that all VOCs frequently produced  
349 mutants, except the Beta/Gamma and XBB VOCs which displayed low levels of  
350 subvariant production (**Supplementary Fig. 9a,b**). Interestingly, Delta, which generated  
351 the most subvariants (**Supplementary Fig. 9b**), showed a high enrichment for mutations  
352 in the Omicron hotspots Q477, N501, and N679 (**Fig. 5a** and **Supplementary Data 3**).  
353 Omicron BA.2.75 also showed high production of subvariants (**Supplementary Fig. 9c**);  
354 the Omicron sublineage BA.4/5 often targeted Y473, Y489, A672, R683, and S691, most  
355 of which were readily seen in previous VOC subvariants, and may represent avenues for  
356 further evolution of SARS-CoV-2 (**Fig. 5b**). In contrast to *S-Pbs* and *S-Rbm*, we detected  
357 very few subvariants in *RdRP* (**Supplementary Fig. 9d**).

358

359 To examine subvariant transmission within the population, we assessed the circulation  
360 time of the top 14 subvariants, which included both functional and non-functional  
361 mutations (**Figure 5b, left panel**). The median circulation time of subvariants with  
362 putative functional mutations (E484, P681, N501, F490) was 56 days compared to the

363 non-functional group (A684, S691, R682, A688, A672) that displayed a median time of  
364 29 days. This indicates that functional subvariants tend to circulate longer than their non-  
365 functional counterparts (**Figure 5b, right panel**). These observations suggest that  
366 alterations in specific residues recurrently arise *de novo* in the viral population, but without  
367 selection pressure, subsequently subside. To directly test this, we compared the affinity  
368 of ACE2 for S-RBMs corresponding to major VOCs, and a prominent Alpha subvariant  
369 we identified, Alpha + F490L. All of the VOCs except for Delta showed a higher affinity to  
370 ACE2 that reflected a slower off-rate for ACE2 binding *in vitro* (**Supplementary Fig. 11**).  
371 Furthermore, Alpha+F490L displayed similar binding kinetics as canonical Alpha,  
372 consistent with this variant *S-Rbm* not possessing a selective advantage. Rapidly  
373 identifying novel subvariants and assessing their functional impact can thus provide a  
374 useful tool to predict the dynamics of spread through the population. Collectively, these  
375 studies show that population-level surveillance of mutable viral pathogens, such as  
376 SARS-CoV-2 provides an extremely useful tool in predicting hotspot and key residues  
377 that will arise as major species in future lineages. Applying this strategy could thus provide  
378 important predictive value in monitoring viral pathogens with potential cross-over  
379 capability.

380

### 381 **Detection of putative SARS-CoV-2 quasispecies by C19-SPAR-Seq**

382 The concept of quasispecies reflects a model of evolution in which imperfect replication  
383 leads to the production of mutant clouds that in aggregate define the evolutionary unit of  
384 selection<sup>17</sup>. In the context of viral evolution, a quasispecies represents a large collection  
385 of mutant genomes, with the dominant sequence reflecting the variant with the highest

386 fitness within the cloud. As such, changes in selection pressure can alter which  
387 quasispecies dominate the population. C19-SPAR-Seq provides deep profiling of SARS-  
388 CoV-2 sequences over functionally important regions of the *S* gene and we assigned  
389 variants based on the major sequence (top read in the deep sequencing pipeline)  
390 obtained from each sample. These top reads accounted for approximately 75% of all  
391 mapped reads per sample on average across the entire dataset (**Supplementary Fig.**  
392 **10b**), suggesting a significant number of minor subvariants were circulating in the  
393 population. Furthermore, using well-barcodes, we showed that the 25% of non-top reads  
394 were correctly assigned to the well, and thus do not represent crosswell contamination  
395 (**Supplementary Fig. 5c, d**). Since the quasispecies hypothesis posits that RNA-virus  
396 populations contain a high level of genetic variants that form a heterogeneous viral pool  
397 within a patient<sup>18, 19, 20, 21</sup>, we investigated these minor reads in greater detail. The  
398 abundance of these minor species is reported to be approximately 1%<sup>22</sup>, which is  
399 quantifiable using C19-SPAR-Seq, given the per-patient read depths that were on  
400 average 115,685 reads.

401  
402 To search for putative quasispecies (pQS), we took advantage of the barcoded  
403 sequencing data we generated for six clinical runs that contained representative samples  
404 from WT, Alpha, Delta, and Omicron B.1.1.529 VOCs (**Supplementary Fig. 5c,d**) and  
405 selected 1,110 samples to perform minor sequence analysis on barcoded *S-Rbm*  
406 sequences as well as non-barcoded *S-Pbs* sequences. The *S-Rbm* barcoding allowed us  
407 to account for cross-contamination, which could contribute significant background noise  
408 that would confound identification of pQS. We established a run-specific multi-step

409 filtering process to identify pQS within each sample (**Fig. 6a**). For this, we assessed total  
410 *S-Rbm* read count distribution in each run to identify high quality samples. Across the six  
411 clinical runs, we assessed the *S-Rbm* sequences further by plotting the number of variant  
412 sequences as a function of distinct read percentage cutoffs for each run (**Fig. 6a**). This  
413 showed a biphasic distribution with background sequence noise, likely caused by  
414 sequencing and PCR errors, increasing exponentially at lower cutoffs. Based on these  
415 distributions we assigned run-specific thresholds that minimized background noise, with  
416 observed cutoffs ranging between ~0.16-0.31% (**Supplementary Fig. 12a**). Overall,  
417 individual pQS represented less than 5% of the reads for their respective amplicon in both  
418 replicates of the barcode analysis for *S-Rbm* and *S-Pbs* (replicate 1: mean = 0.376% and  
419 standard deviation = 0.676%; replicate 2: mean = 0.311% and standard deviation =  
420 0.296%; **Supplementary Fig. 13**), in accordance with previous reports that quasispecies  
421 are found at low frequencies<sup>22</sup>. We also assessed pQS in non-barcoded *S-Pbs* reads.  
422 Here, the background cutoffs ranged between ~0.127-0.25% (**Supplementary Fig. 12b**)  
423 and 1.89% of the tested samples had sequences passing the cutoffs (**Supplementary**  
424 **Fig. 12c**).

425  
426 Applying these stringent cutoffs to samples across the four tested VOCs yielded a total  
427 of 228 samples with *S-Rbm* pQS (20.5% of samples). WT samples showed the highest  
428 proportion of *S-Rbm* pQS (65.98%; **Fig. 6b**), while Alpha, Delta, and Omicron accounted  
429 for lower (18.48%, 4.39%, and 11.14%, respectively). Of the *S-Rbm* pQS, we identified  
430 29 distinct species, while pQS frequency and number of distinct species was much less  
431 for *S-Pbs* (21 samples and 8 species, respectively; **Supplementary Fig. 12d**). For

432 example, the G496A pQS in *S-Rbm* was found in 118 different WT samples (**Fig. 6c**). We  
433 identified several samples that possessed multiple pQS in *S-Rbm* (109) or *S-Pbs* (1) and  
434 9 samples with pQS in both *S-Rbm* and *S-Pbs*. Quasispecies analyses suggest that these  
435 sequences are not random in nature, but rather cluster around specific mutational profiles.  
436 In particular, WT and Alpha were enriched for G496A/C species that were observed in  
437 96.89% and 95.24% of total *S-Rbm* pQS sequences, respectively, but these changes  
438 were only in 20% of Delta pQS, where G496R (33.33%) was predominant (**Fig. 6b**).  
439 These highlight G496 as an evolutionary target, and indeed G496S became a defining  
440 mutation of the Omicron lineage. Similarly, of the other pQS identified in WT, 5 out of 9  
441 variant defining positions in *S-Rbm*, and one variant defining position in *S-Pbs* were  
442 targeted that would later be mutated in future VOCs (**Fig. 6c, Supplementary Fig. 12d**,  
443 red stars). We also noted that pQS were much more frequent in the *S-Rbm* compared to  
444 *S-Pbs* (29 unique sequences *versus* 8), consistent with the key role of the *S-Rbm* in  
445 transmission and immune evasion. Interestingly, analysis of pQS in Omicron BA.1.1.529  
446 showed only various combinations of reversion to WT sequences (**Fig. 6c**), suggesting  
447 that the Omicron *S-Rbm* is highly optimized for transmission (*ie* ACE2 interaction and  
448 immune escape), and that revertants are a favoured evolutionary trajectory. Indeed,  
449 R493Q was a WT revertant in Omicron BA 2/3-4/5 and the *S-Rbm* S496G was a revertant  
450 in Omicron BA 2/3-4/5 and XBB.1.5 (**Fig. 6c and Supplementary Fig. 14a**). Furthermore,  
451 although we sampled Omicron the most, only 6.1% of Omicron samples contributed *S-*  
452 *Rbm* pQS sequences (**Supplementary Table 7**).

453

454

## 455 **Mutational variants predict future evolutionary trajectories of SARS-CoV-2**

456 To systematically assess whether changes associated with subvariants and pQS in the  
457 population might reflect viral sampling of functionally important residues, we developed a  
458 mutational compendium for *S-Rbm* and *S-Pbs* by combining subvariant and pQS data  
459 (**Fig 5a, Fig. 6c, Fig. 7a, Supplementary Data 3 and Supplementary Fig. 12d**). This  
460 showed that *S-Rbm* was highly susceptible to alterations that often predated VOC  
461 emergence, particularly around functional residues (**Fig. 7a, left panel**). For example,  
462 T478 was identified in both subvariants and pQS of WT virus and subsequently emerged  
463 in Delta and Omicron VOCs as a T478K mutation. Similarly, E484 and N501, both of  
464 which were altered in multiple strains, were identified in WT populations prior to VOC  
465 emergence. In Alpha, we noted that changes in F486 and F490 that extinguished by mid-  
466 2021 (see above, **Fig. 5b**), re-appeared as subvariants of the parental Omicron strain  
467 BA.1.529, and later became fixed as F486P and F490S in XBB.1.5, BA.2.86, and FLip  
468 that emerged through to late 2023<sup>23</sup>. N481 on the other hand was identified in subvariants  
469 of later Omicron strains (BA.2, BA.4/5) and emerged in late 2023, as N481K in the  
470 BA.2.86 lineage. Interestingly, while the WT virus tended to sample the ACE2 contact  
471 residues such as N501 that contributes to ACE2 affinity, subsequent VOCs displayed  
472 expansion of variations to include neutralizing Ab contact regions such as F490 and F491  
473 (**Fig. 7a, upper left panel**). Indeed, recent studies show that while alterations in Omicron  
474 significantly impact immune recognition, infectivity is variably impacted and typically  
475 reduced<sup>23</sup>.

476

477 We also analyzed the *S-Pbs* that showed mutational sampling of residue N679 and P681  
478 in WT that was subsequently altered in Alpha (P681H), Delta (P681R), Omicron (N679K  
479 and P681H), and B.2.86 (N679K and P681R; **Fig. 7a, right panel**). Furthermore, other  
480 mutations near the RRxR motif that promote S1/S2 cleavage<sup>24</sup> were found as VOC  
481 subvariants, but did not expand, suggesting they have no major selective advantage for  
482 the virus (**Fig. 7a**). Finally, we observed no subvariants or pQS with alterations in R685,  
483 which is essential for Furin cleavage. Collectively, these data demonstrate that mapping  
484 subvariants and pQS provides predictive and suggest that early viral diversification tends  
485 to target viral intrinsic features, while later phases target immune escape.

486  
487 Our analysis of subvariants and pQS efficiently identified residues mutationally sampled  
488 during SARS-CoV-2 viral evolution, but the specific change that emerged in future  
489 variants was rarely identified. Indeed, of 158 *S-Rbm* and 87 *S-Pbs* subvariant and pQS  
490 changes, only 8 from *S-Rbm* and 3 from *S-Pbs* reflected the specific amino acid alteration  
491 that would later emerge (**Fig. 5a, Fig. 6c, Fig. 7a, Supplementary Data 3 and**  
492 **Supplementary Fig. 12d**). Recently, systematic deep mutational scanning (DMS) was  
493 performed to measure phenotypes of XBB.1.5 and BA.2 spike proteins, thus providing a  
494 map of how all specific mutational changes in Spike impact serum escape, cell entry, and  
495 receptor binding<sup>25</sup>. We took advantage of this study to determine the functional impact  
496 of specific *S-Rbm* and *S-Pbs* VOC subvariants and pQS identified by our C19-SPAR-seq  
497 pipeline. This showed that most (96%) of observed VOC subvariants and pQS in *S-Rbm*  
498 impacted Spike function, while 79% of *S-Pbs* alterations targeted residues with DMS  
499 scores (**Fig. 7b**). Many of these changes were measured as advantageous to virus (DMS

500 > 0) for human sera escape (36% of *S-Rbm* and 24.3% of *S-Pbs*; **Fig. 7b, top panels,**  
501 **red tiles**); Spike-mediated entry (28% of *S-Rbm* and 18.6% of *S-Pbs*; **Fig. 7b, middle**  
502 **panels, red tiles**), whereas alterations in S-Rbm targeting ACE2 binding were much less  
503 frequent (13%) compared to 31.4% for *S-Pbs* (**Fig. 7b, bottom panels, red tiles**). These  
504 studies highlight that the extensive sampling of evolutionary space by SARS-CoV-2 leads  
505 to subvariants and pQS changes that are of relevance for specific viral functions.

506

## 507 **Discussion**

508 Population-scale surveillance is crucial to monitor SARS-CoV-2 spreading and its  
509 evolution over time. We took advantage of the high-throughput C19-SPAR-seq pipeline  
510 to monitor variant spreading and evolution. We screened over 73,510 SARS-CoV-2  
511 positive samples from December 2020 to March 2023 (**Fig. 1a**) and through next-  
512 generation sequencing were able to capture both the major top-reads as well as the minor  
513 read sequences per patient. This data provides a wealth of sequence information across  
514 *S-Rbm* and *S-Pbs*, two of the most critical regions for viral function and amongst the most  
515 mutable within the SARS-CoV-2 genome.

516

517 Our initial C19-SPAR-Seq pipeline was designed to detect the presence or absence of  
518 SARS-CoV-2 within patients in a high-throughput and multiplexed manner. Here, we  
519 reasoned that our methodology was amenable to survey the mutational landscape and  
520 evolution of SARS-CoV-2 at a population level without much change to the existing  
521 methodology. While much of the original pipeline was performed by hand on small  
522 numbers of samples, population-level surveillance would require a much more robust and



523 high-throughput pipeline. Utilization of robotics to automate the multiplexing, barcoding,  
524 PCR and sample pooling significantly speeds up the processing and reduces human  
525 and/or clerical errors. Additionally, we have automated the bioinformatics analysis  
526 pipeline such that the hands-on time from sample acquisition to final data output is less  
527 than 2 hours of the 24-hour pipeline (**Supplementary Fig. 2**). This truly allows for a one-  
528 day turnaround on patient data which is the gold standard during a global pandemic. While  
529 this pipeline is robust for the detection of SARS-CoV-2 variants and mutants as we have  
530 highlighted here, we provide it as a highly amenable resource for any potential future viral  
531 pandemic.

532

533 To highlight the flexibility of our pipeline, we had to change our PCR strategy for the  
534 detection of the *S-Rbm* around the time of emergence of the Delta VOC, as our initial  
535 primers did not capture the T478 residue that defined Delta (**Fig. 2b**). It was essential that  
536 we were quickly and readily able to adapt our C19-SPAR-Seq platform with new primers  
537 that generated a longer amplicon allowing us to capture this key residue. Importantly, we  
538 implemented this change in only four days and tested the assay performance in four  
539 independent clinical runs (**Supplementary Fig. 2,3**). The speed at which we were able  
540 to implement these changes is critical when faced with highly mutable viral pathogens.  
541 While we have focused our analysis here on the *S-Rbm* and *S-Pbs* amplicons, the design  
542 and implementation of primers to other regions of the viral genome could easily be added  
543 and multiplexed into our assay pipeline seamlessly.

544

545 One concern with large amounts of PCR-based NGS is the potential cross-contamination  
546 of patient samples and subsequent calling of false positives and/or negatives. We  
547 confirmed that the contamination rate of our pipeline was very low (< 3%) by designing  
548 the *S-Rbm* V2 primers with an additional barcode (**Supplementary Fig. 5**). The use of  
549 these new primers further supports how flexible our assay is to the implementation of new  
550 primer pairs. One potential concern about the use of these barcoded primers is that they  
551 can become quite costly to use for daily surveillance and monitoring; however, based on  
552 the high confidence of correctly mapped reads and well-barcode pairs in our pilot tests  
553 (**Supplementary Fig. 2,3**), we opted to use non-barcoded primers for the majority of the  
554 daily surveillance with the idea that they could be used if necessary to detect any potential  
555 contamination or to assay pipeline performance in sporadic sequencing runs.

556  
557 Within our jurisdiction we were able to report the dynamic of variant spreading that mirrors  
558 the worldwide global SARS-CoV-2 evolution and identified the main VOCs as well as  
559 major mutations with these VOCs (**Fig. 2**). Interestingly, we always observed the same  
560 repetitive pattern within the population where a VOC would arise as a dominant peak,  
561 followed by VOC subvariants that displayed minimal spread, extinguished and were then  
562 superseded by the next major incoming VOC (**Fig. 2**). Importantly, by comparing with  
563 DMS we found that most subvariants and pQS led to functionally relevant changes,  
564 suggesting that population-level spread is mediated by complex interactions that may not  
565 be readily predicted from assays of individual viral functions. Integrating how individual  
566 molecular functions combine to enable population-level spread could be an important tool  
567 for predicting which novel viruses and or their variants are a public health concern.

568

569 Through systematic tracking of variant introductions into the GTA, we noted that spread  
570 occurred in waves, raising questions about what mechanisms might underlie these  
571 dynamics. NPIs could serve as one mechanism for mitigating disease spread within a  
572 population, but we failed to note any specific pattern associated with acceleration waves,  
573 suggesting NPIs did not make major contributions to regulating the spread of SARS-CoV-  
574 2 within our jurisdiction. Similar conclusions with respect to the impact of school closings  
575 have been reached<sup>26, 27</sup>, while analysis of viral spread in New York City suggests local  
576 geographic constraints might also contribute to this pattern<sup>14</sup>. Furthermore, human social  
577 networks display substructure with peak degrees of interaction of approximately 150<sup>28</sup>.  
578 This substructure, possibly modified by geographic considerations, vaccination, and prior  
579 exposure, may thus collectively create social layers that act to blunt viral spread.  
580 Importantly, since current mathematical models, such as the SIR model<sup>29</sup>, assume  
581 homogeneity in social networks, they may not be accurate models of viral expansion  
582 within the population. In the future it would be of interest to investigate how each of these  
583 factors might affect wave dynamics and potential impact of pathogenic viruses in large  
584 populations.

585

586 Analysis of the major VOC mutations revealed that the initial WT Wuhan strain and  
587 subsequent VOCs often gave rise to subvariants with acquired mutations in residues that  
588 often became defining features of later VOCs (**Fig. 3,4, and 7**). Furthermore,  
589 approximately 25% of our sequencing reads for any given sample did not belong to the  
590 predominant sequence and do not constitute contamination (**Supplementary Fig. 5**). For

591 RNA viruses, quasispecies represent the low abundance sequences and heterogeneity  
592 found within a patient sample that may lay the foundation for the emergence and evolution  
593 of new mutants<sup>18, 19, 20, 21, 22</sup>. We therefore developed a stringent filtering strategy that  
594 employed well bar-coding to identify pQS from these high-quality samples and found  
595 repeated sequence patterns associated with specific VOCs, consistent with QS theory.  
596 This identified 29 unique pQS in *S-Rbm* and 8 in *S-Pbs*, with certain targeted residues  
597 that would eventually be mutated in future VOCs. By combining subvariant and pQS  
598 monitoring, daily real-time surveillance could thus seed a predictive diagnostic platform  
599 that learns the future evolutionary trajectory of highly infectious and/or virulent viruses.  
600 This could be an important arm of a One Health strategy that seeks to profile mutational  
601 dynamics of high risk viruses with zoonotic potential, such as highly pathogenic avian  
602 influenza virus.

603

604 In summary, we have developed and optimized our previously reported C19-SPAR-Seq  
605 pipeline and deployed it to profile 73,510 SARS-CoV-2-positive patients collected from  
606 December 2020 to March 2023 within our jurisdiction. We utilized this platform to identify  
607 VOCs, characterize VOC expansion patterns, and prospectively identify mutations  
608 characteristic of future evolutionary trajectories. Our development of a systematic, high  
609 intensity, relatively low-cost sequencing platform could serve as a blueprint for NGS-  
610 based surveillance of other highly mutable pathogens at risk of evolving large-scale  
611 transmission characteristics.

## 612 **Methods**

### 613 **Samples collection, Total RNA extraction, and control samples**

614 Positive patient samples were obtained from the Department of Microbiology at Mount  
615 Sinai Hospital under MSH REB Study #21-0099-E - Mapping the Emergence and  
616 Functional Impact of Novel SARS-CoV-2 Variants. RNA from positive samples was  
617 extracted with MGIEasy Nucleic Acid Extraction Kit. We designed and generated the four  
618 S gene RNAs to use as an internal control for each C19-SPAR-Seq run or as a matrix for  
619 well-BC-S-Rbm-V2 primers. pcDNA3.1 containing the S gene was purchased from  
620 Synbio-Technologies. Site-directed mutagenesis was performed to introduce silent  
621 mutations into the amplicon region of each gene using the indicated primers and PCR  
622 with KOD followed by DpnI (NEB) digestion of the wild-type template DNA (see  
623 **Supplementary Data 4**). Successful mutagenesis was confirmed by Sanger sequencing.  
624 Single-stranded RNA of each mutant was subsequently produced by *in vitro* translation  
625 using the MEGAscript T7 kit (Invitrogen). The four S mutants were used sequentially in  
626 the C19-SPARseq as technical control.

627

### 628 **C19-SPAR-Seq primer design and optimization**

629 C19-Spar-Seq used optimized multiplex PCR primers for SARS-CoV-2 (S, N, and *RdRP*)  
630 and human *ACTB* genes with amplicon size > 100 bases (**Supplementary Table 1**). In  
631 this study we used *S-Rbm V2* primers to generate a larger *Rbm* amplicon (Supplementary  
632 Table 1) and well barcoded *S-Rbm-V2* primers to deconvolute inter- and intrawell  
633 contamination as well as determine true minor sequencing mutants (**Supplementary**  
634 **Table 4**)

### 635 **Master Mix plates preparation**

636 Reverse Transcript, Multiplex PCR, and Barcode PCR master mix plates (without enzyme  
637 and patient samples) were prepared *ex tempo* in 384 well plates in the pre-PCR station.  
638 The barcode primer plates were prepared by STARPlus in the pre-PCR station too.  
639 Enzymes (Reverse transcriptase and Polymerase) were dispensed by Echo 555, and  
640 RNA, cDNA of patient samples, and the barcode primers were added by the Biomek NxP  
641 *ex tempo*.

642

### 643 **Reverse Transcription (RT)**

644 Total RNA was reverse transcribed using SuperScript™ IV Reverse Transcriptase  
645 (Invitrogen) in 5X First-Strand Buffer containing DTT, a custom mix of Oligo-dT (Sigma),  
646 and Hexamer random primers (Sigma), dNTPs (Genedirex). We followed the  
647 manufacturer's protocol. Each reaction included: 0.25 µL Oligo-dT, 0.25 µL hexamers,  
648 0.5 µL dNTP (2.5 mM each dATP, dGTP, dCTP, and dTTP), 2 µl 5X First-Strand Buffer,  
649 0.5 µl 0.1 M DTT, *quantum satis* (qs) 5.5 µL RNase/DNase free water. Then 0.5 µl of  
650 SuperScript™ IV RT (200 units/µl) using Echo 555 robotic and 4 µL purified Total RNA  
651 was added by Biomek NxP. Samples were incubated at 25°C for 10', 50°C for 10', 80°C  
652 for 10', and then stored at 4°C. cDNA was diluted in RNase/DNase-free water at 1/5 by  
653 Biomek NxP.

654

### 655 **Multiplexing PCR**

656 The multiplex PCR reaction was carried out using Phusion polymerase (ThermoFisher).  
657 The manufacturer's recommended protocol was followed with the following primer

658 concentrations: *Spoly* at 0.05 $\mu$ M, *SRbm* at 0.05 $\mu$ M, *RdRP* at 0.05 $\mu$ M, and *ActB* at  
659 0.025 $\mu$ M for C19-SPAR-Seq V1 and *Spoly* at 0.038 $\mu$ M, *SRbm-V2* at 0.1 $\mu$ M, *RdRP* at  
660 0.017 $\mu$ M, and *ActB* at 0.025 $\mu$ M for C19-SPAR-Seq V1.2. For each reaction: 2  $\mu$ L 5X  
661 Phusion buffer, 0.2  $\mu$ L dNTP (2.5 mM each dATP, dGTP, dCTP, and dTTP), primers, *qs*  
662 5.9  $\mu$ L RNase/DNase free water, then 0.1  $\mu$ L Phusion Hot start polymerase and 4  $\mu$ L of  
663 diluted cDNA were added by Echo 555 and Biomek NxP respectively. The thermal cycling  
664 conditions were as follows: one cycle at 98°C for 2', and 30 cycles of 98°C for 15'', 60°C  
665 for 15'', 72°C for 20'', and a final extension step at 72°C for 5' and then stored at 4°C.  
666 Primer sequences are listed in **Supplementary Table 1**.

667

#### 668 **Barcoding PCR**

669 For multiplex barcode sequencing, dual-index barcodes were used<sup>8</sup>. The second PCR  
670 reaction on multiplex PCR was performed using the Phusion polymerase (ThermoFisher).  
671 For each reaction: 2  $\mu$ L 5X Phusion buffer, 0.2  $\mu$ L dNTP (2.5 mM each dATP, dGTP,  
672 dCTP, and dTTP), 2  $\mu$ L Barcoding primers F+R (pre-mix), *qs* 5.9 $\mu$ L RNase/DNase free  
673 water, then 0.1  $\mu$ L Phusion polymerase, 4  $\mu$ L of multiplex PCR reaction were added by  
674 Echo 555 and Biomek NxP respectively. The thermal cycling conditions were as follows:  
675 one cycle at 98°C for 30'', and 15 cycles of 98°C for 10'', 65°C for 30'', 72°C for 30'', and  
676 a final extension step at 72°C for 5' and stored at 4°C.

677

#### 678 **Library preparation and Sequencing**

679 Libraries were pooled by Biomex Fx. Each sample was pooled (7 $\mu$ L/sample) and library  
680 PCR products were purified twice with SPRIselect beads ratio 1:1 (beads/library)

681 (A66514, Beckman Coulter). All libraries were sequenced with MiSeq or NextSeq 300 or  
682 MiniSeq (Illumina) using 100bp single-end sequencing. well-BC libraries were sequenced  
683 using Paired-end with Read 1: 144 cycles and Read 2: 8 cycles.

684

### 685 **Whole Genome Sequencing**

686 Sequencing libraries were prepared from extracted patient RNAs using Qiagen QIAseq  
687 SARS-CoV-2 Primer Panel (Cat# 333896) according to the manufacturer's instructions.  
688 Library fragment size was then checked using an Agilent Fragment Analyzer and  
689 quantified with qPCR using Colibri™ Library Quantification Kit (ThermoFisher,  
690 Cat#A38524500) on a BioRad CFX96 Touch Real-Time PCR Detection System. Quality-  
691 checked libraries were loaded onto an Illumina NextSeq 500 running with PE 150 cycles.  
692 Real-time base call (.bcl) files were converted to FASTQ files using Illumina bcl2fastq2  
693 conversion software v2.17 (on CentOS 6.0 data storage and computation Linux servers).  
694 The genome mapping and variant calling were performed by CLC Genomics Workbench  
695 V21.0.1 with QIAseq SARS-CoV2 workflow V1.0. The resulting consensus sequences  
696 were then uploaded to Pangolin for lineage assignment.

697

### 698 **Cloning and Recombinant Expression of Variants RBM**

699 SARS-CoV2 variant amplicons were obtained by PCR from cDNA generated from reverse  
700 transcribed patient samples collected and sequence verified during the recent SARS-  
701 CoV2 pandemic. The wild-type (Wuhan variant), Alpha, Beta, Delta, Omicron, and novel  
702 (F490L) variants RBM residues 319 - 596 fused with a human signal sequence at the N-  
703 terminal were cloned into a pFastBacl vector modified to contain bacterial Biotin ligase



704 (BirA) recognition motif and poly-Histidine tag to the C-terminus. Constructs were  
705 expressed as described<sup>30</sup>. Media was dialyzed against a buffer containing 200 mM NaCl,  
706 40 mM Tris HCl pH 7.5, and 10 mM Imidazole overnight. Dialyzed media was incubated  
707 in Nickel NTA beads, washed in a Buffer containing 10mM Imidazole, and RBM-His was  
708 eluted with 150mM Imidazole.

709

### 710 **RBM Biotinylation**

711 One mg of variants RBM was biotinylated overnight at room temperature in buffer  
712 containing 15mL of 1 mg/mL *E. coli* BirA Biotin Ligase, 100 ml of buffer mix B (25 ml  
713 500mM ATP, 25 mL 500mM MgOAc, 62.5ml D-Biotin 1mM in 0.5M Bicine made up with  
714 12.5 mL ddH<sub>2</sub>O) and purified on 24 mL size exclusion Superdex-200 Column. Biotinylated  
715 RBM protein was concentrated, estimated, and stored away at -80°C until used.

716

### 717 **Determination of SARS-CoV-2 RBM-hACE2 Affinity**

718 The affinity between hACE2 and the SARS-CoV-2 S- RBM were determined using  
719 streptavidin (SA) biosensors and the Octet RED96 system (ForteBio Inc., Menlo Park,  
720 CA, USA). First, the recombinant RBMs were biotinylated, purified on a size-exclusion  
721 column (Superdex S75), and immobilized on the SA biosensors at 10 µg/mL in a working  
722 buffer containing 25 mM Tris-HCl pH 7.5, 150 mM NaCl, 0.05% Tween-20, and 0.1%  
723 BSA. The biosensors were hydrated in the working buffer for 30 minutes at room  
724 temperature prior to RBM loading. The hACE2 was diluted in the same working buffer in  
725 a two-fold serial dilution series from 970 nM to 15.2 nM (7 different concentrations). The  
726 interactions were measured by incubating the loaded sensors in parallel with the seven

727 concentrations of hACE2 and one with only a working buffer as control. The real-time  
728 binding response ( $\Delta\lambda$  in nanometers, nm) at each concentration was corrected by  
729 subtracting the background signal measured in the control sample. The kinetic  
730 parameters and affinities were estimated based on a one-to-one binding model with a  
731 global fit of the data, using the Octet data analysis software (version 7.1, ForteBio Inc.,  
732 Menlo Park, CA, USA).

733

### 734 **Data Processing**

735 The fastq files were demultiplexed with bcl2fastq and aligned with bowtie (v 0.12.7 with  
736 settings --best -v 3 -k 1 -m 1 -S) and counts were quantified with HTSeq-count (v0.13.5  
737 with settings -f sam -t CDS). Custom python scripts (python v3.9) were developed to  
738 identify, track, and quantify key mutations (Supplementary Fig2) in the amplicons within  
739 samples and to aggregate the data. In early analysis versions, custom R scripts (R v4.1.1  
740 with packages dplyr and openxlsx) were used to apply a quality control filter based on  
741 H2O control total viral amplicon counts. In intermediate versions, the minimum read cutoff  
742 was calculated as [(median of the control sample *S-Rbm* amplicon counts) + (2\*(median  
743 absolute deviation of control sample *S-Rbm* amplicon counts))] or a minimum value of 10,  
744 whichever is higher. An *S-Rbm* coverage filter to determine confidence in the top read  
745 was specified as a 15 percentage point minimum difference between the proportion of  
746 WT reads to the top read variants within a sample (for samples where the top read variant  
747 was not WT). In final versions of the processing pipeline, the QC functions were added to  
748 the python script, the median *S-Rbm-v2* viral read count cutoff was expanded to include  
749 all H2O, HEK, and NoRT controls, and the *S-Rbm* filters were applied to the *S-Rbm-v2*

750 amplicon instead. Additionally, the final pipeline version is wrapped into a shell script  
751 which executes data processing and QC checks in one command.

752

### 753 **Well-Barcoding Methods**

754 To quantify well-to-well contamination we devised a new set of *S-Rbm* PCR barcodes for  
755 the rows (R1) and columns (R2) on a 384-well plate. With minor modifications to our  
756 existing V2 analysis pipeline, we added R2 processing to assess pairs of reads. Additional  
757 code checks for read pairs and then tracks the percentage of each valid row and column  
758 PCR barcode pair. We tested 7 plates and found that for non-control samples across all  
759 plates, sequences with the correct unique PCR barcode pair assigned to the well made  
760 up, on average, 97% of the *S-Rbm* reads per well.

761

### 762 **Rate of Change of Variant Analysis**

763 To calculate VOC case slopes and quantify the rate of change of slopes, the data  
764 aggregated for selected VOCs is subsetted per collection day, then quantified against the  
765 daily case total across all VOCs to calculate the daily proportion of each VOC. The time  
766 in days since the first case of the VOC is calculated with the *lubridate* package<sup>31</sup> and  
767 linear models are fitted to the data in sliding windows of 5 days with the *lm()* function to  
768 obtain a slope. Missing data is imputed by taking the average of the previous day and the  
769 next day's values. Finally, the slopes are visualized as a heatmap with the x axis  
770 representing the first day of the 5-day window to assess the dynamics of the VOC over  
771 time.

772

## 773 **Quasispecies Detection**

774 Using the data with *S-Rbm* PCR well-barcodes, we analyzed viral quasispecies in the  
775 samples, split into groups by run ID and variant call. Samples failing QC in the normal  
776 pipeline, or without a confident variant call, were excluded. Processing is done per run-  
777 variant group with a set of custom python and shell scripts ([https://github.com/wrana-](https://github.com/wrana-lab/SPARSEQ_QUASISPECIES)  
778 [lab/SPARSEQ\\_QUASISPECIES](https://github.com/wrana-lab/SPARSEQ_QUASISPECIES)). For each sample, the forward and reverse barcodes  
779 are checked to verify that they match the sample's well. Reads surpassing a minimum  
780 length are trimmed to remove barcodes and primers and sorted into groups of unique  
781 sequences. The groups are quantified as percentages of the total set of sequences per  
782 amplicon and per sample, and the most prevalent sequence is dropped. Sequences  
783 passing a minimum count threshold are aggregated for further analysis. A set of seven  
784 minimum thresholds (0.01%, 0.02%, 0.05%, 0.1%, 0.2%, 0.5%, 1%) are used to assess  
785 background levels of sequences per run-variant group. The resulting counts of pQS from  
786 the three least stringent cutoffs are used to fit a linear model to calculate the x-intercept  
787 for the run-variant group, which is used for a final round of processing as a customized  
788 cutoff. Finally, each set of resulting sequences is compared to the corresponding  
789 repeated group, and sequences found in the same sample in both copies of the samples  
790 are aligned and presented as finalized quasispecies sequences. Any sample where over  
791 5% of the reads are identified as pQS is filtered out. This process was repeated for *S-*  
792 *Pbs* sequences; however, these sequences were not barcoded, so the barcode-matching  
793 portion of the pipeline was not applied.

794

795

796 **Code Availability**

797 All of the code required to reproduce these findings and to perform the C19-SPAR-Seq  
798 analysis pipeline is available at <https://github.com/wrana-lab/SPARseq>.

799

800 **Data Availability**

801 Data that support the findings of this study have been deposited in the NCBI Gene  
802 Expression Omnibus (GEO) under the SuperSeries GSE231416  
803 (<https://www.ncbi.nlm.nih.gov/geo/query/acc.cgi?acc=GSE231416>) which contains the  
804 following subsets: the main dataset including the sample data table is under GSE224951;  
805 the well-barcoded dataset is under GSE231415; and the well-barcoded repeat dataset is  
806 under GSE246819.

807

808 **References**

- 809 1. Zhou P, *et al.* A pneumonia outbreak associated with a new coronavirus of  
810 probable bat origin. *Nature* **579**, 270-273 (2020).
- 811 2. WHO. Coronavirus disease 2019 (COVID-19): dashboard. *World Health*  
812 *Organization* [https:// covid19.who.int/](https://covid19.who.int/).
- 813 3. consortiumcontact@cogconsortium.uk C-GU. An integrated national scale SARS-  
814 CoV-2 genomic surveillance network. *Lancet Microbe* **1**, e99-e100 (2020).
- 815 4. Rambaut A, *et al.* Preliminary genomic characterisation of an emergent SARS-  
816 CoV-2 lineage in the UK defined by a novel set of spike mutations. *Genom Epidemiol*,  
817 (2020).
- 818 5. Tegally H, *et al.* Detection of a SARS-CoV-2 variant of concern in South Africa.  
819 *Nature* **592**, 438-443 (2021).
- 820 6. Faria NR, *et al.* Genomics and epidemiology of the P.1 SARS-CoV-2 lineage in  
821 Manaus, Brazil. *Science* **372**, 815-821 (2021).
- 822 7. Starr TN, *et al.* Deep Mutational Scanning of SARS-CoV-2 Receptor Binding  
823 Domain Reveals Constraints on Folding and ACE2 Binding. *Cell* **182**, 1295-1310 e1220  
824 (2020).
- 825 8. Greaney AJ, *et al.* Complete Mapping of Mutations to the SARS-CoV-2 Spike  
826 Receptor-Binding Domain that Escape Antibody Recognition. *Cell Host Microbe* **29**, 44-  
827 57 e49 (2021).
- 828 9. Aynaud M-M, *et al.* A multiplexed, next generation sequencing platform for high-  
829 throughput detection of SARS-CoV-2. *Nature Communications* **12**, 1405 (2021).
- 830

- 831 10. Walker AS, *et al.* Tracking the Emergence of SARS-CoV-2 Alpha Variant in the  
832 United Kingdom. *N Engl J Med* **385**, 2582-2585 (2021).
- 833 11. Konings F, *et al.* SARS-CoV-2 Variants of Interest and Concern naming scheme  
834 conducive for global discourse. *Nat Microbiol* **6**, 821-823 (2021).
- 835 12. Andersen KG, Rambaut A, Lipkin WI, Holmes EC, Garry RF. The proximal origin  
836 of SARS-CoV-2. *Nat Med* **26**, 450-452 (2020).
- 837 13. Walls AC, Park YJ, Tortorici MA, Wall A, McGuire AT, Veerler D. Structure,  
838 Function, and Antigenicity of the SARS-CoV-2 Spike Glycoprotein. *Cell* **181**, 281-292  
839 e286 (2020).
- 840 14. Dellicour S, *et al.* Variant-specific introduction and dispersal dynamics of SARS-  
841 CoV-2 in New York City - from Alpha to Omicron. *PLoS Pathog* **19**, e1011348 (2023).
- 842 15. Smallman-Raynor MR, Cliff AD, Consortium C-GU. Spatial growth rate of  
843 emerging SARS-CoV-2 lineages in England, September 2020-December 2021.  
844 *Epidemiol Infect* **150**, e145 (2022).
- 845 16. Ontario. Eligibility for PCR Testing and Case and Contact Management Guidance  
846 in Ontario. In: *News ontario*).
- 847 17. Domingo E, Perales C. Viral quasispecies. *PLoS Genet* **15**, e1008271 (2019).
- 848 18. Andino R, Domingo E. Viral quasispecies. *Virology* **479-480**, 46-51 (2015).
- 849 19. Nowak MA. What is a quasispecies? *Trends Ecol Evol* **7**, 118-121 (1992).
- 850 20. Xu D, Zhang Z, Wang FS. SARS-associated coronavirus quasispecies in individual  
851 patients. *N Engl J Med* **350**, 1366-1367 (2004).
- 852 21. Al Khatib HA, *et al.* Within-Host Diversity of SARS-CoV-2 in COVID-19 Patients  
853 With Variable Disease Severities. *Front Cell Infect Microbiol* **10**, 575613 (2020).

- 854 22. Jary A, *et al.* Evolution of viral quasispecies during SARS-CoV-2 infection. *Clin*  
855 *Microbiol Infect* **26**, 1560 e1561-1560 e1564 (2020).
- 856 23. Qu P, *et al.* Immune Evasion, Infectivity, and Fusogenicity of SARS-CoV-2  
857 Omicron BA.2.86 and FLip Variants. *bioRxiv*, (2023).
- 858 24. Ord M, Faustova I, Loog M. The sequence at Spike S1/S2 site enables cleavage  
859 by furin and phospho-regulation in SARS-CoV2 but not in SARS-CoV1 or MERS-CoV.  
860 *Sci Rep* **10**, 16944 (2020).
- 861 25. Dadonaite B, *et al.* Spike deep mutational scanning helps predict success of  
862 SARS-CoV-2 clades. *Nature* **631**, 617-626 (2024).
- 863 26. Neil-Sztramko SE, *et al.* What is the specific role of schools and daycares in  
864 COVID-19 transmission? A final report from a living rapid review. *Lancet Child Adolesc*  
865 *Health* **8**, 290-300 (2024).
- 866 27. Tan W. School closures were over-weighted against the mitigation of COVID-19  
867 transmission: A literature review on the impact of school closures in the United States.  
868 *Medicine (Baltimore)* **100**, e26709 (2021).
- 869 28. West BJ, *et al.* Relating size and functionality in human social networks through  
870 complexity. *Proc Natl Acad Sci U S A* **117**, 18355-18358 (2020).
- 871 29. Nguyen TK, Hoang NH, Currie G, Vu HL. Enhancing Covid-19 virus spread  
872 modeling using an activity travel model. *Transp Res Part A Policy Pract* **161**, 186-199  
873 (2022).
- 874
- 875 30. Shang J, *et al.* Structural basis of receptor recognition by SARS-CoV-2. *Nature*  
876 **581**, 221-224 (2020).



877 31. Grolemond G, Wickham H. Dates and Times Made Easy with lubridate. *Journal of*  
878 *Statistical Software* **40**, 1 - 25 (2011).

879

880 32. Gavor E, Choong YK, Er SY, Sivaraman H, Sivaraman J. Structural Basis of  
881 SARS-CoV-2 and SARS-CoV Antibody Interactions. *Trends Immunol* **41**, 1006-1022  
882 (2020).

883 33. Verkhivker G. Structural and Computational Studies of the SARS-CoV-2 Spike  
884 Protein Binding Mechanisms with Nanobodies: From Structure and Dynamics to Avidity-  
885 Driven Nanobody Engineering. *Int J Mol Sci* **23**, (2022).

886 34. Naidoo DB, Chuturgoon AA. The Potential of Nanobodies for COVID-19  
887 Diagnostics and Therapeutics. *Mol Diagn Ther* **27**, 193-226 (2023).

888

889

890

891 **Figure legends**

892 **Fig. 1 Integration of C19-SPAR-Seq to detect SARS-CoV-2 Variants of Concern. a.**

893 Schematic representation of the preclinical testing of patient samples for SARS-CoV-2  
894 (Step 1) and the C19-SPAR-Seq multiplex sequencing pipeline (Step 2) to identify  
895 variants of concern. **b.** Analysis of SARS-CoV-2-positive patient samples by C19-SPAR-  
896 Seq V1. A pilot cohort (n = 1,198) was analyzed by C19-SPAR-Seq and the Z-score of  
897  $\log_{10}(\text{read counts}+1)$  for each of the indicated amplicons is presented in a heatmap.  
898 Samples are ordered from lowest to highest read counts for *S-Rbm*, with negative control  
899 samples on the right (n = 20). **c.** Representative alignment of top read counts for *S-Rbm*.  
900 Seven representative cases are shown aligned to the *S-Rbm* reference sequence,  
901 nucleotide substitutions are shown in red within the sequence and amino acid changes  
902 are highlighted in a red box. The Variant of Concern (VOC) that each sample contains is  
903 shown on the right of the sequence. **d.** Quantification of all major mutations observed in  
904 the pilot cohort. The frequency of each observed mutation is indicated. **e.** Number of C19-  
905 SPAR-Seq runs per week (Y-axis) from December 2020 to March 2023 (X-axis). Red  
906 bars are runs with the multiplex primer V1 and blue bars are runs with the multiplex V2  
907 primers of the C19-SPAR-seq pipeline. **f.** Description of the number of samples run  
908 through the C19-SPAR-Seq (red).

909

910

911

912 **Fig. 2 Results of an Improved C19-SPAR-Seq V2 pipeline.** Line graph of the total  
913 number of cases for each canonical VOC from December 2020 to March 2023 (upper  
914 panel). Percentage of the weekly cases of the variants, the peaks and cross-over are  
915 indicated with dot and dashed lines respectively (lower panel).

916  
917 **Fig. 3 Variant dynamic and Non-Pharmaceutical Interventions (NPIs).** a. Schematic  
918 of the procedure to track the dynamic spread of the virus (see Methods) showing the  
919 proportion of Alpha, Delta and Omicron cases with representation of linear models along  
920 sliding 5 days windows (red line) (upper panel). Slopes from each linear model (lower  
921 panel). b. Dynamic spread using slopes of WT, Alpha, Delta and Omicron B1.1.529. NPIs  
922 are plotted (red lines indicate closures or restrictions and green lines indicate openings;  
923 see **Supplementary Table 6**)

924  
925 **Fig. 4 Population-level surveillance of variant dynamics by C19-SPAR-Seq.** a.  
926 Quantitation of all major mutations observed in the pilot cohort. The frequency of each  
927 observed mutation is plotted and color-coded based on their location in the SARS-CoV-  
928 2 genome b. Phylogenetic tree of the WT strain and the early variants. c. Binary heat map  
929 of each canonical VOC and non-canonical VOC ordered by date of first detection. Within  
930 each coloured box is each mutant that shares a common VOC sequence trace. d. For  
931 each variant, the percentage of canonical VOC is shown with a solid line, and the  
932 percentage of mutant VOC is represented with a dash-line.

933

934 **Fig. 5 Major VOC subvariants within the *S-Rbm* and *S-Pbs* sequences. a.** Percentage  
935 of top reads with a mutation detected in a given amino acid in *S-Rbm* and *S-Pbs*. The  
936 percentage of a point mutation at each amino acid position is shown. Canonical VOCs  
937 mutations are indicated in grey. The binding site of *S-Rbm* with hACE2 (black tiles) and  
938 9 neutralizing antibodies are shown (white-purple scale, with darker purple indicating  
939 contact with more antibodies)<sup>32, 33, 34</sup>, as well as the *S-Pbs* cleavage site (S1 subunit  
940 indicated in purple, S2 subunit indicated in yellow) **b.** Heatmap of case counts of the top  
941 14 key subvariants and the circulation time (time from the 1st-last case) are plotted with  
942 functional subvariants shown in red and non-functional subvariants shown in light blue.

943  
944 **Fig. 6 Detection of putative quasispecies by C19-SPAR-Seq. a.** Schematic of pQS  
945 detection. **b.** Percentage of putative quasispecies detected in *S-Rbm* and *S-Pbs*  
946 sequences on WT, Alpha, Delta, and Omicron B.1.1.529 samples. **c.** *S-Rbm* and *S-Pbs*  
947 putative quasispecies sequences.

948  
949 **Fig. 7 Functional Impact of VOC subvariants and putative quasispecies. a.** Summary  
950 of all mutations and/or putative quasispecies found in *S-Rbm* and *S-Pbs*. *S-Rbm* and *S-*  
951 *Pbs* reference sequences are indicated with VOC-associated changes highlighted in red.  
952 At top left, the binding site of *S-Rbm* with hACE2 (black tiles) and 9 neutralizing antibodies  
953 are shown (white-purple scale, with darker purple indicating contact with more  
954 antibodies)<sup>32, 33, 34</sup>, as well as the *S-Pbs* cleavage site at top right (S1 subunit indicated in  
955 purple, S2 subunit indicated in yellow). Changes identified in pQS (purple), subvariants

956 (blue), or both (pink) identified in the indicated VOC are shown. Each variant defining  
957 mutations are highlighted in blue for each variant **b**. Functional impact of VOC subvariants  
958 and pQS alterations. Alterations identified in systematic screening were compared with  
959 functional profiling of Spike deep mutational scanning<sup>25</sup>. Upper panel shows scores  
960 obtained for human sera escape, middle panel shows scores from Spike-mediated entry,  
961 and lower panel shows scores for ACE2 binding (*S-Rbm* on left, *S-Pbs* on right). For each  
962 heatmap, scales for deep mutational scanning scores are shown, with scores above 0  
963 indicating an advantage for viral expansion and highlighted with red outlines. Negative  
964 values are blue, indicating no advantage, and are not highlighted. Grey boxes indicate  
965 NA values.

966

## 967 **Acknowledgments**

968 The authors are grateful to all the people who reported to COVID-19 test centers in  
969 Toronto and the GTA.

970 This work is supported by Canadian Institutes of Health Research (Grant #177705)  
971 awarded by L.P. and J.L.W. The authors wish to thank the Network Biology Collaborative  
972 Centre Robotics Facility (RRID: SCR\_025391) at the Lunenfeld-Tanenbaum Research  
973 Institute for the automation of the C19-SPAR-Seq platform. The facility is supported by  
974 the Canada Foundation for Innovation and the Ontario Government. The facility is  
975 supported by the Canada Foundation for Innovation and the Ontario Government. Work  
976 in the Pelletier lab was funded by CIHR Foundation (FDN # 167279) and Krembil  
977 Foundation. L.P. is a Tier 1 Canada Research Chair in Centrosome Biogenesis and

978 Function. K.N.A. was supported by Medicine by Design Postdoctoral and H.L. Holmes  
979 Postdoctoral Fellowships.

980

### 981 **Author contributions**

982 J.L.W., K.N.A., and M.M.A. designed the study. M.M.A., R.P., M.J., P.M.V., N.D., L.Z.,  
983 A.A-F., F.Y., and A.A. performed C19-SPAR-Seq experiments. L.C., K.N.A., S.P, K-R.Z,  
984 A.O., and S.B performed NGS analysis and established the C19-SPAR-Seq interpretation  
985 pipeline. L.C., K-R.Z, A.O., and S.B updated and maintained the code. L.C. aggregated  
986 and managed the dataset and performed data analysis. M.M.A. and K.N.A. assisted with  
987 the rest of the analysis. K.C. performed sequencing. M.M.A. and M.J. set up the pipeline  
988 automation. A.A.O, M.J, and K.C. performed biochemistry experiments on the variant  
989 affinity assay under the supervision of J.R. and J.L.W.. T.M. provided access to patient  
990 samples, collection of diagnostics information, and assembly of the cohorts. P.Y., J.S,  
991 J.B., I.L., and B.G.W. coordinated the access to patient samples and generated WGS  
992 data. All experiments were carried out under the supervision of L.P and J.L.W. The  
993 manuscript was written by M.M.A., L.C., K.N.A., L.P., and J.L.W. with input from T.M.and  
994 J.R..

995

### 996 **Ethical declarations**

### 997 **Competing Interests statement**

998 The authors declare no competing interests.

999

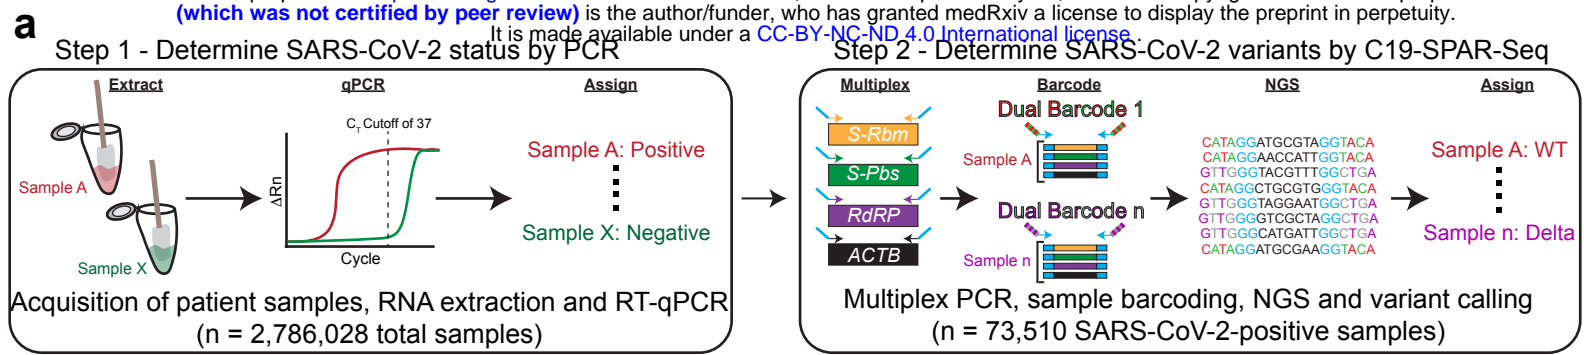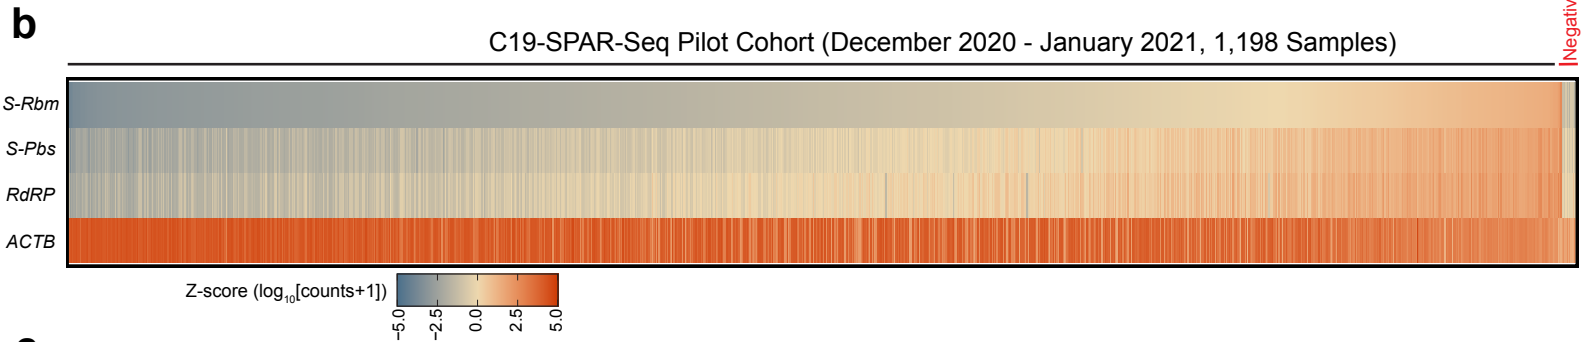

**c**

|                        | G482        | V483         | E484           | G485        | F486  | P499         | T500                   | N501        | G502  | V503        | N679         | S680 | P681 | R682 | R683 | VoC |
|------------------------|-------------|--------------|----------------|-------------|-------|--------------|------------------------|-------------|-------|-------------|--------------|------|------|------|------|-----|
| <i>S-Rbm</i> Reference | G G T G T T | G A A        | G G T T T T... | C C C A C T | A A T | G G T G T T  | <i>S-Pbs</i> Reference | A A T T C T | C C T | C G G C G G | WT           |      |      |      |      |     |
| W51902961              | G G T G T T | G A A        | G G T T T T... | C C C A C T | T A T | G G T G T T  | W51902961              | A A T T C T | C A T | C G G C G G | Alpha        |      |      |      |      |     |
| W51904066              | G G T G T T | G A A        | G G T T T T... | C C C A C T | T A T | G G T G T T  | W51904066              | A A T T C T | C A T | C G G C G G | Alpha        |      |      |      |      |     |
| W51906227              | G G T G T T | G A A        | G G T T T T... | C C C A C T | T A T | G G T G T T  | W51906227              | A A T T C T | C A T | C G G C G G | Alpha        |      |      |      |      |     |
| W51907976              | G G T G T T | G A A        | G G T T T T... | C C C A C T | T A T | G G T G T T  | W51907976              | A A T T C T | C A T | C G G C G G | Alpha        |      |      |      |      |     |
| W51907988              | G G T G T T | G A A        | G G T T T T... | C C C A C T | T A T | G G T G T T  | W51907988              | A A T T C T | C A T | C G G C G G | Alpha        |      |      |      |      |     |
| W52005967              | G G T G T T | G A A        | G G T T T T... | C C C A C T | T A T | G G T G T T  | W52005967              | A A T T C T | C A T | C G G C G G | Alpha        |      |      |      |      |     |
| W52003774              | G G T G T T | A A A        | G G T T T T... | C C C A C T | T A T | G G T G T T  | W52003774              | A A T T C T | C C T | C G G C G G | Beta         |      |      |      |      |     |
|                        |             | <b>E484K</b> |                |             |       | <b>N501Y</b> |                        |             |       |             | <b>P681H</b> |      |      |      |      |     |

**d**

| Date       | WT  | Alpha | Beta/Gamma |
|------------|-----|-------|------------|
| 12-17-2020 | 1   | 0     | 0          |
| 12-18-2020 | 115 | 0     | 0          |
| 12-19-2020 | 166 | 0     | 0          |
| 12-20-2020 | 142 | 0     | 0          |
| 12-21-2020 | 229 | 0     | 0          |
| 12-22-2020 | 165 | 0     | 0          |
| 12-23-2020 | 33  | 0     | 0          |
| 01-18-2021 | 1   | 0     | 0          |
| 01-19-2021 | 164 | 5     | 0          |
| 01-20-2021 | 126 | 1     | 1          |

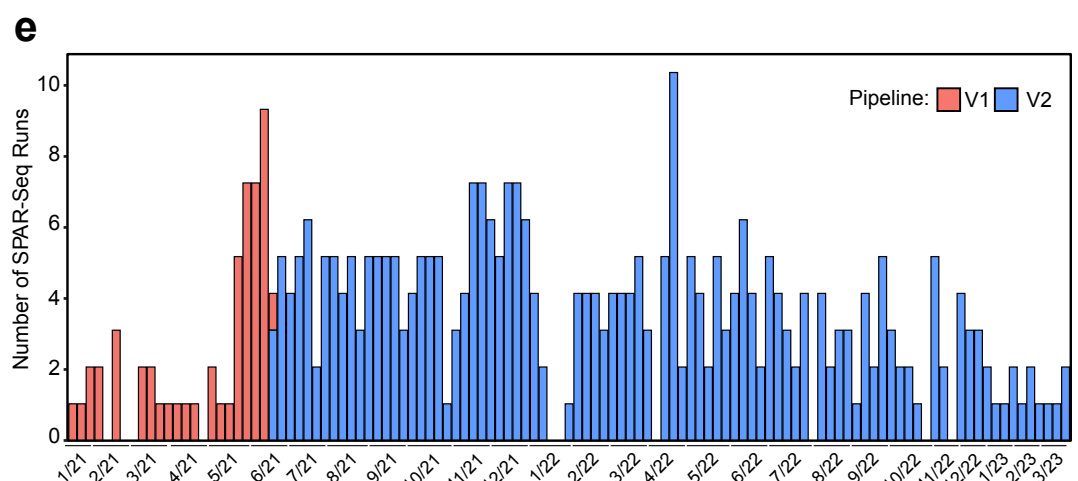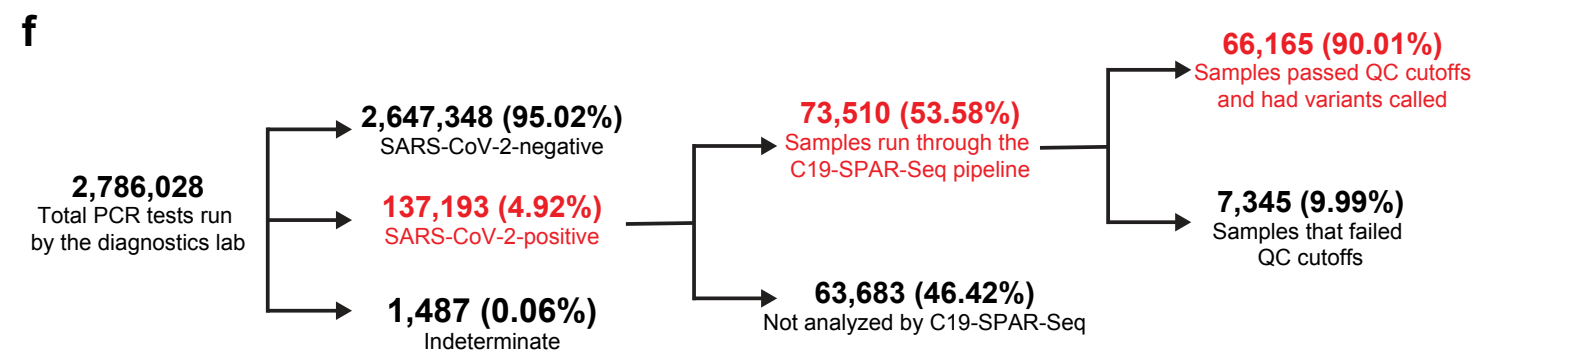

Fig. 1

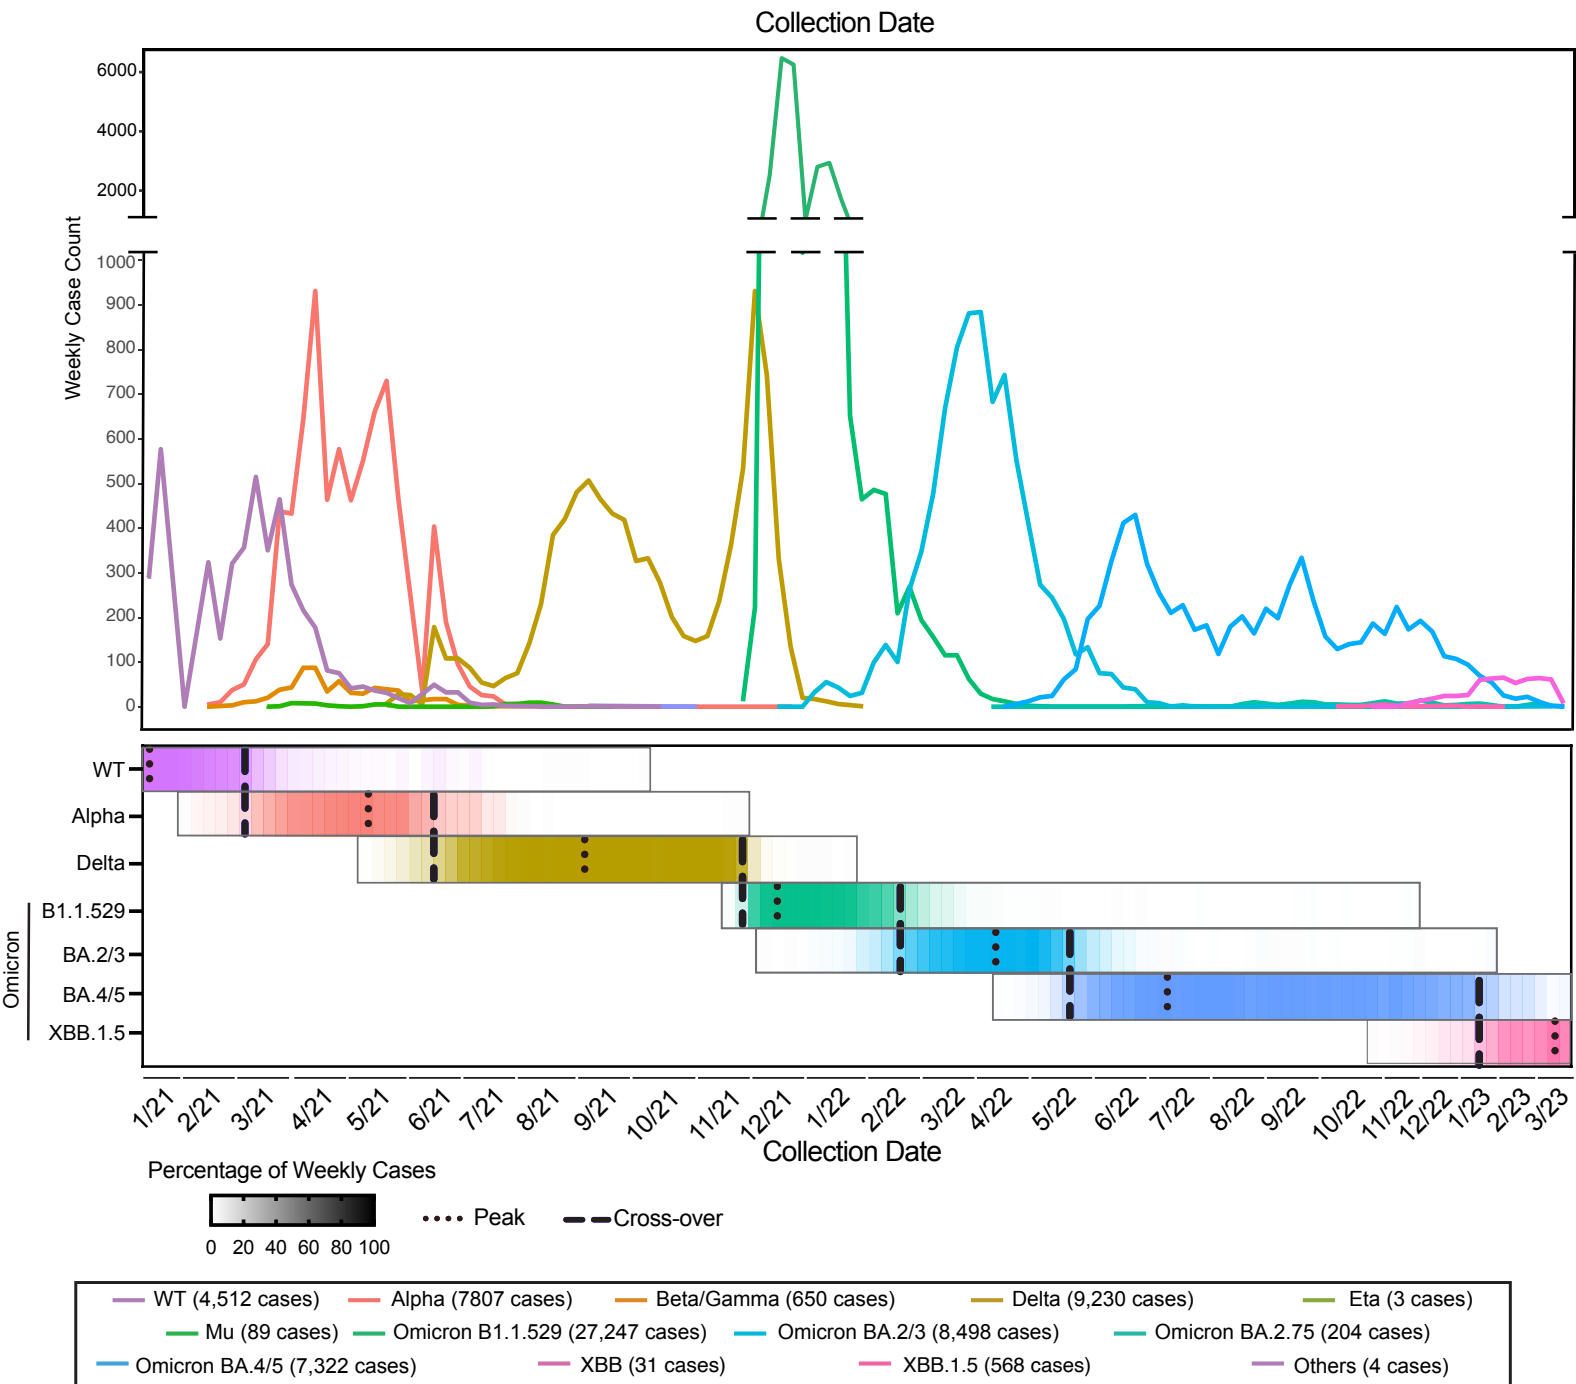

Fig. 2



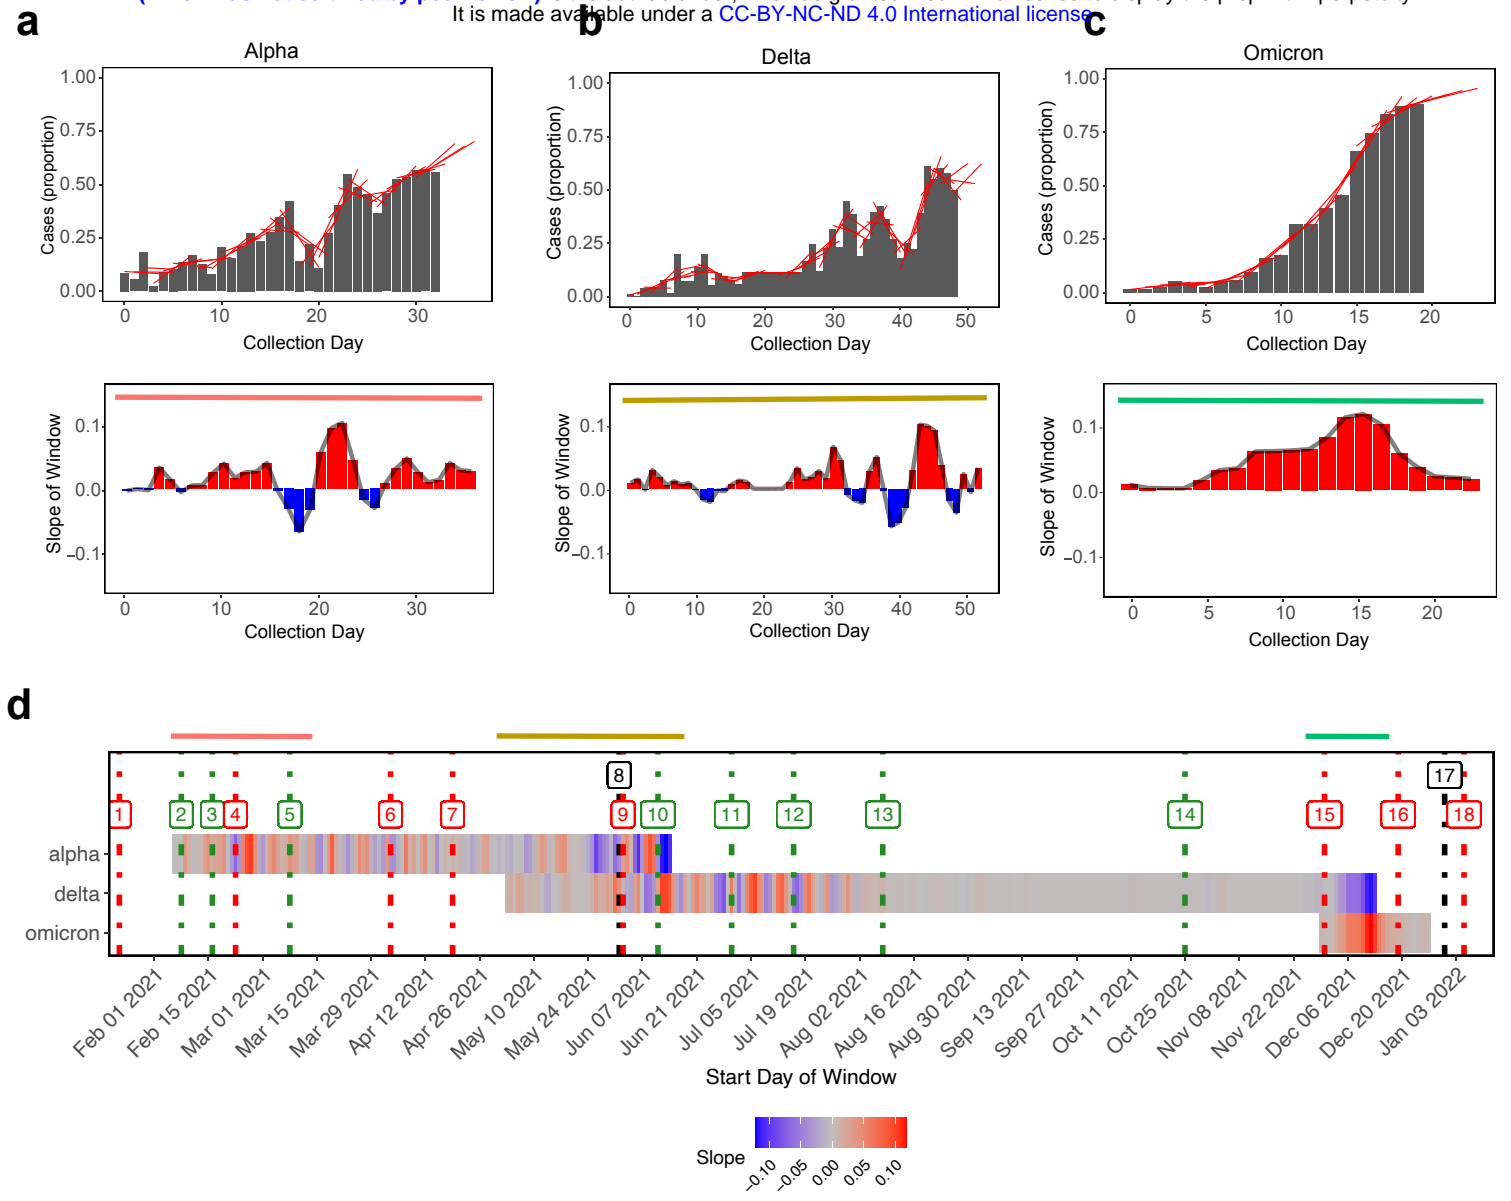

Fig. 3

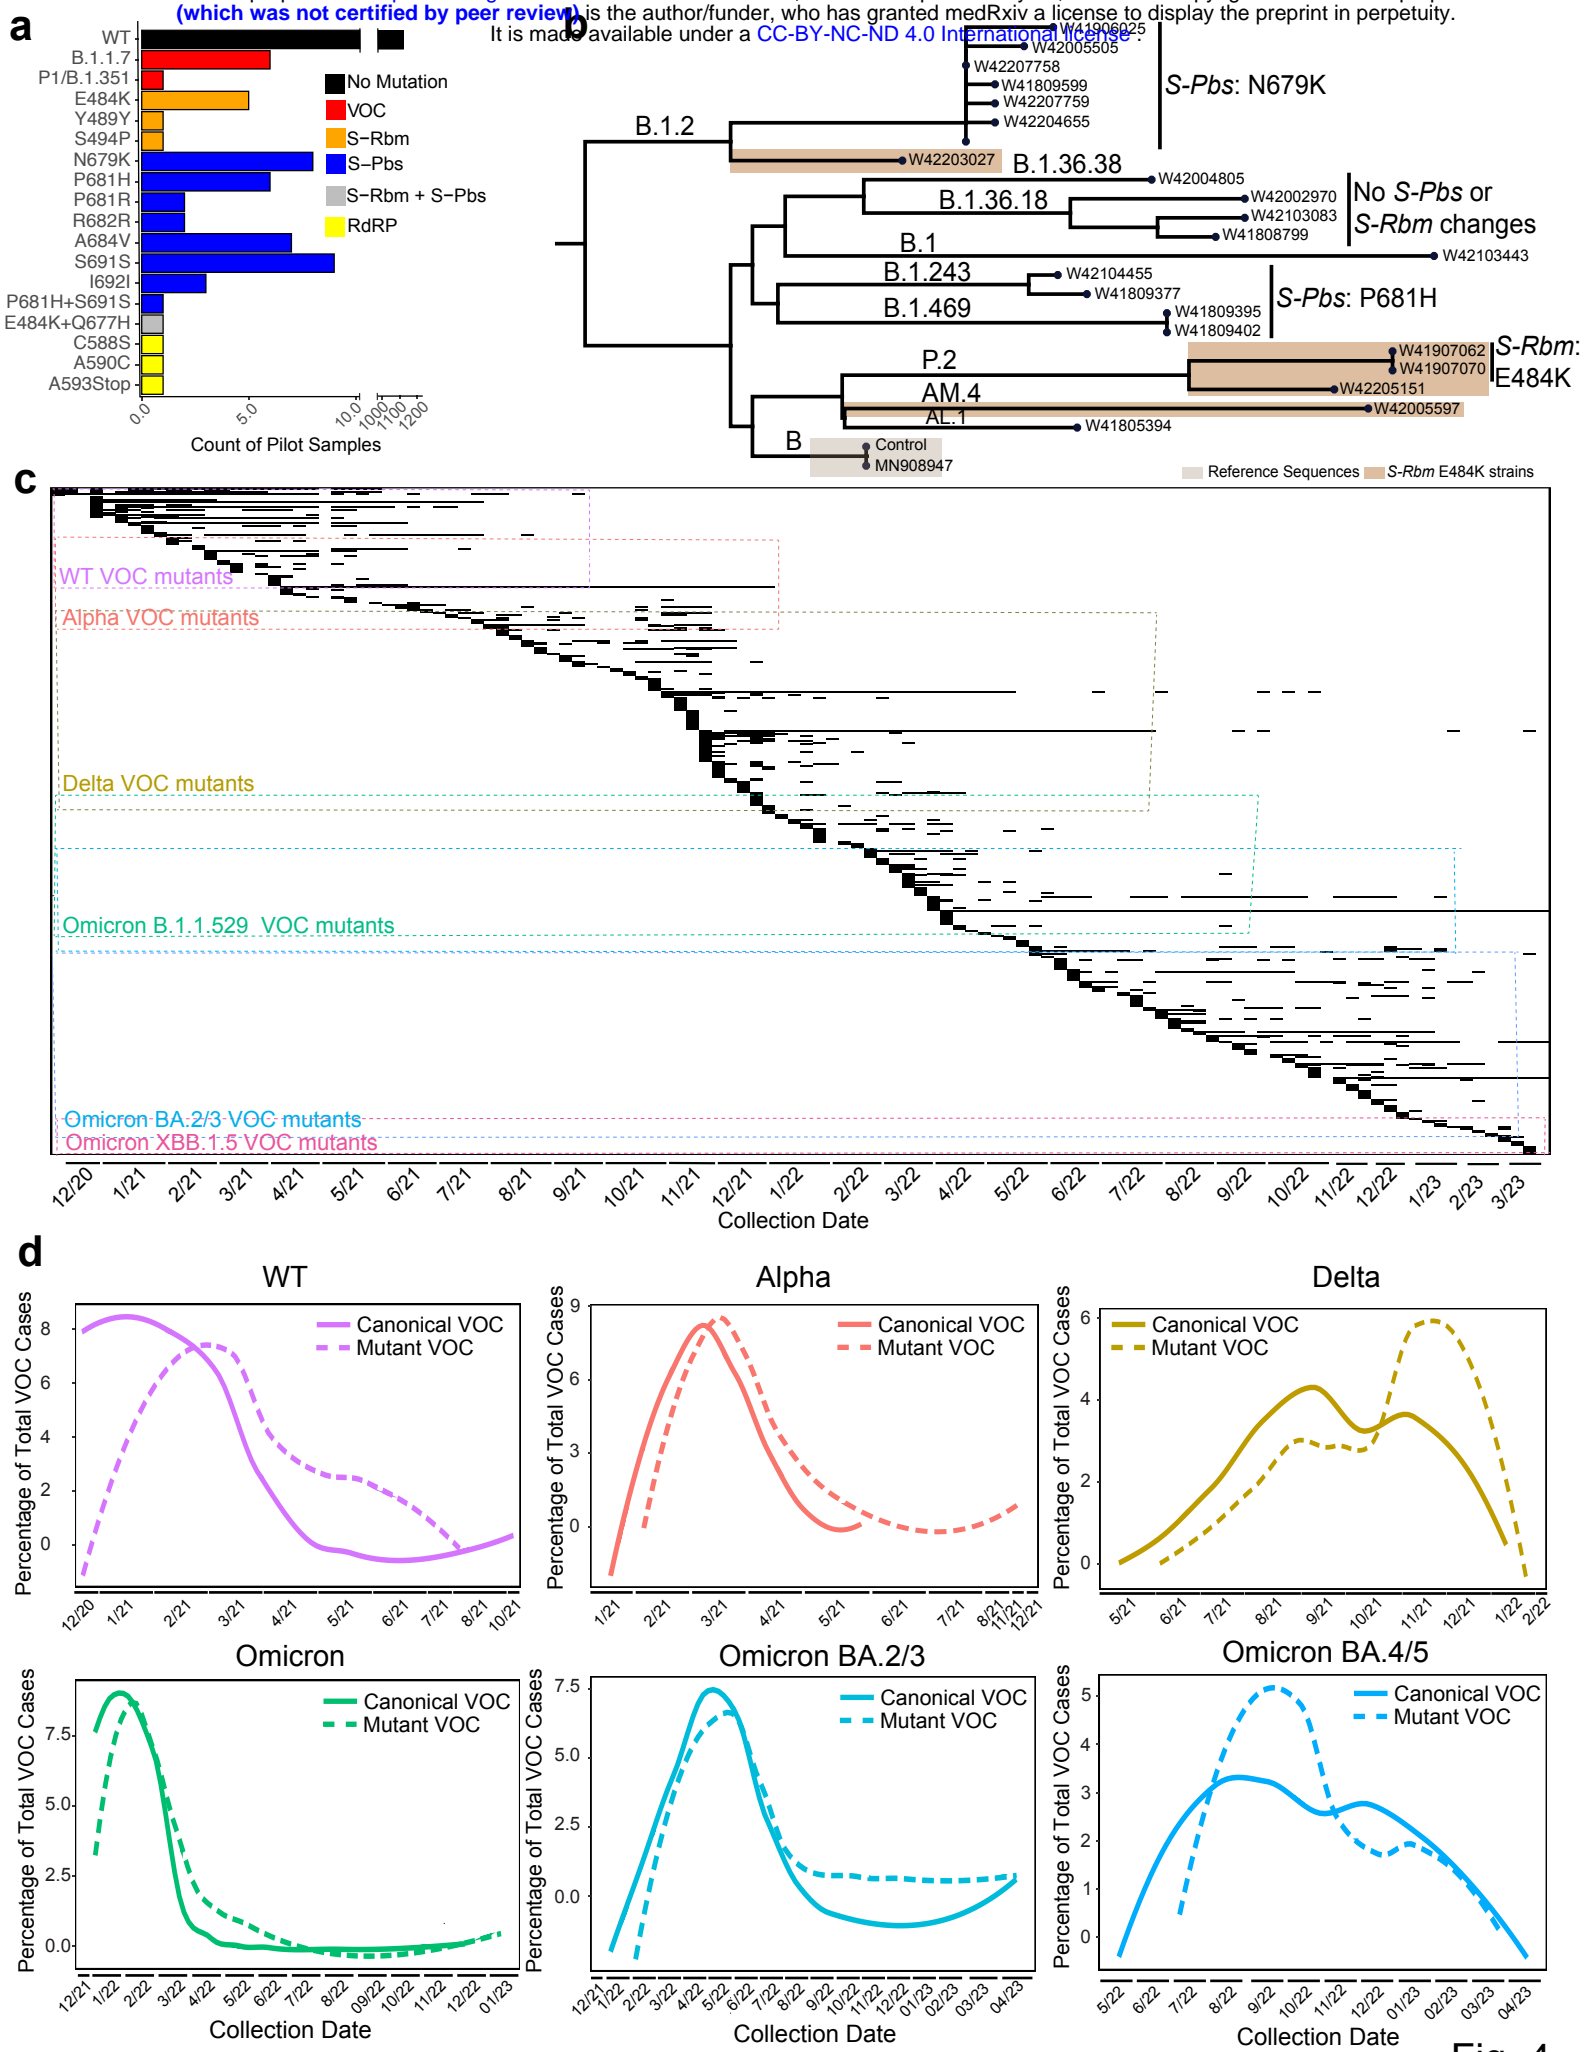

Fig. 4

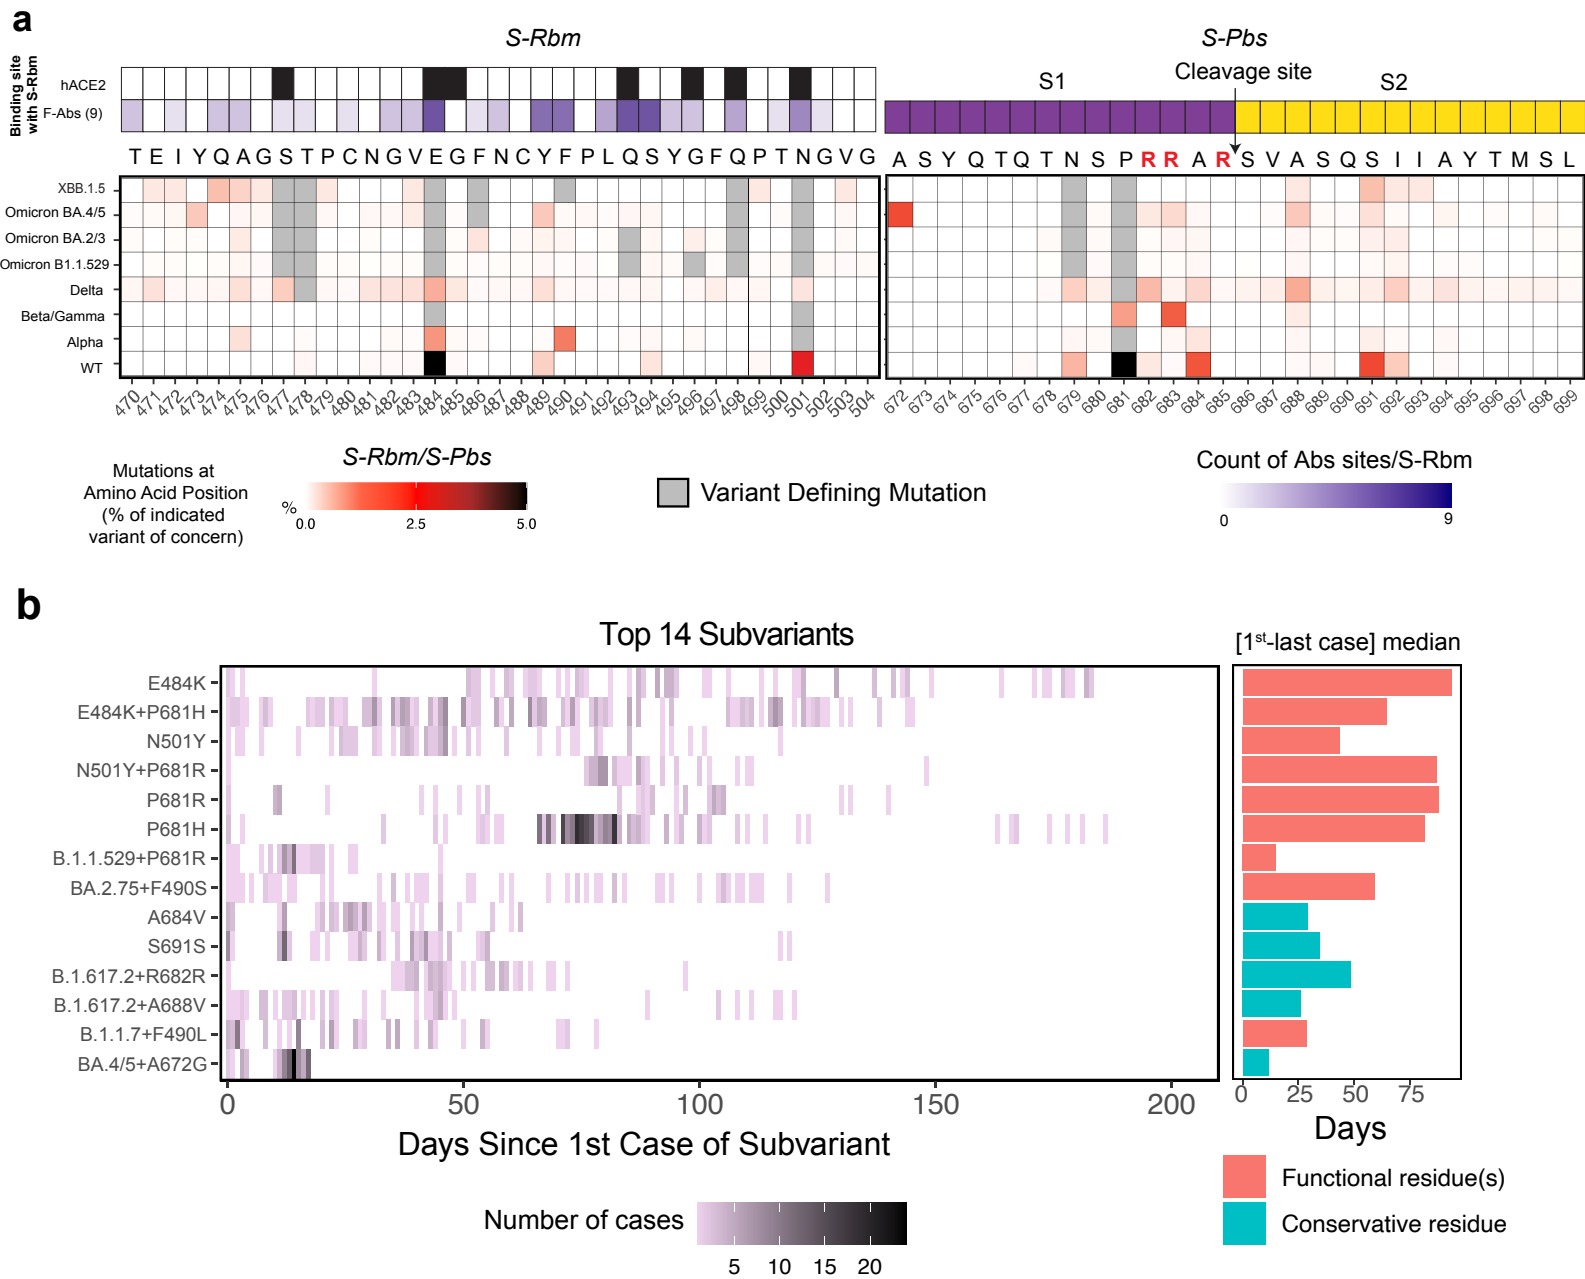

Fig. 5

**a**

**SARS-CoV-2 samples retested in duplicate (BC1 and 2)**

Remove indeterminate/mixed samples  
 ↓  
 Split samples per VOC group per sequencing run  
 ↓

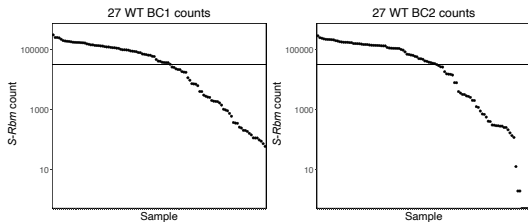

Keep samples with > 32k *S-Rbm* read counts

Calculate % of total read per sequence  
 Drop top reads  
 ↓

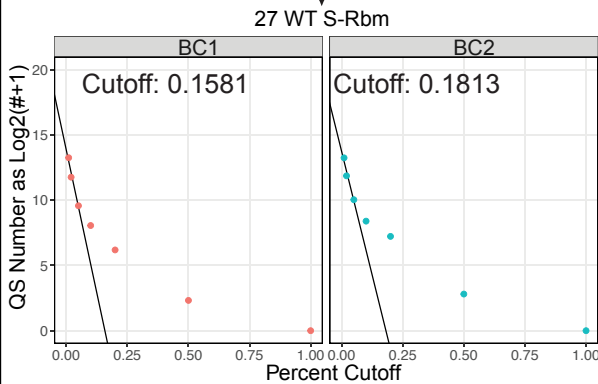

Test 7 Cutoffs: 1%, 0.5%, 0.2%, 0.1%, 0.05%, 0.02%, 0.01%

Custom Cutoff based on linear projection of the 3 lower cutoffs

Keep sequence for a given sample found in the duplicate runs (BC1 and 2)  
 ↓

List of putative quasispecies detected in WT, Alpha, Delta, Omicron

**b**

*S-Rbm* qs (341)  
 Total qs = 363 found in 240 samples  
 (each sample+seq is 1 count)

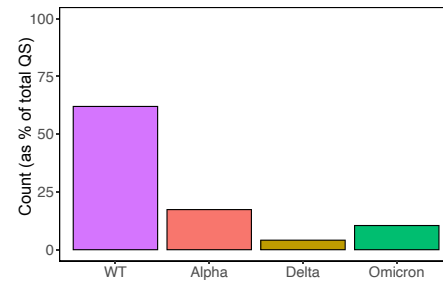

**c**

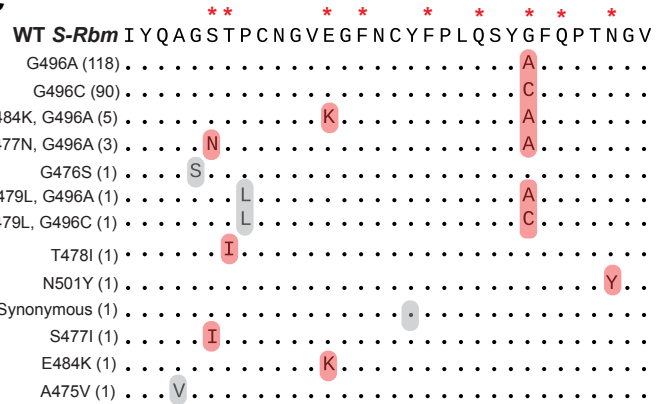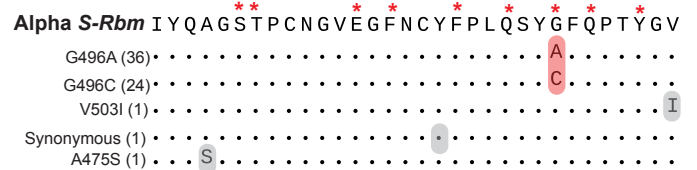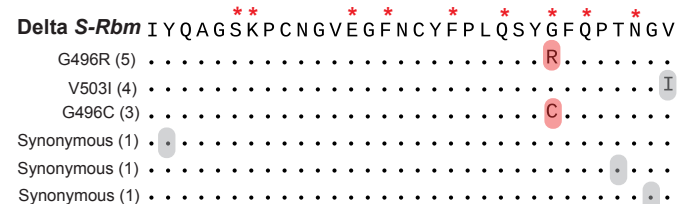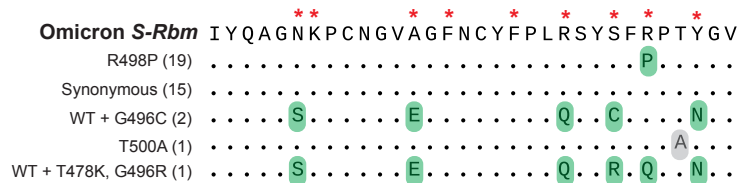

- \*SARS CoV2 RBM variant defining mutations
- qs mutation at variant defining mutation position
- qs mutation at non variant defining mutation position
- qs revert mutation at variant defining mutation position

**Fig. 6**

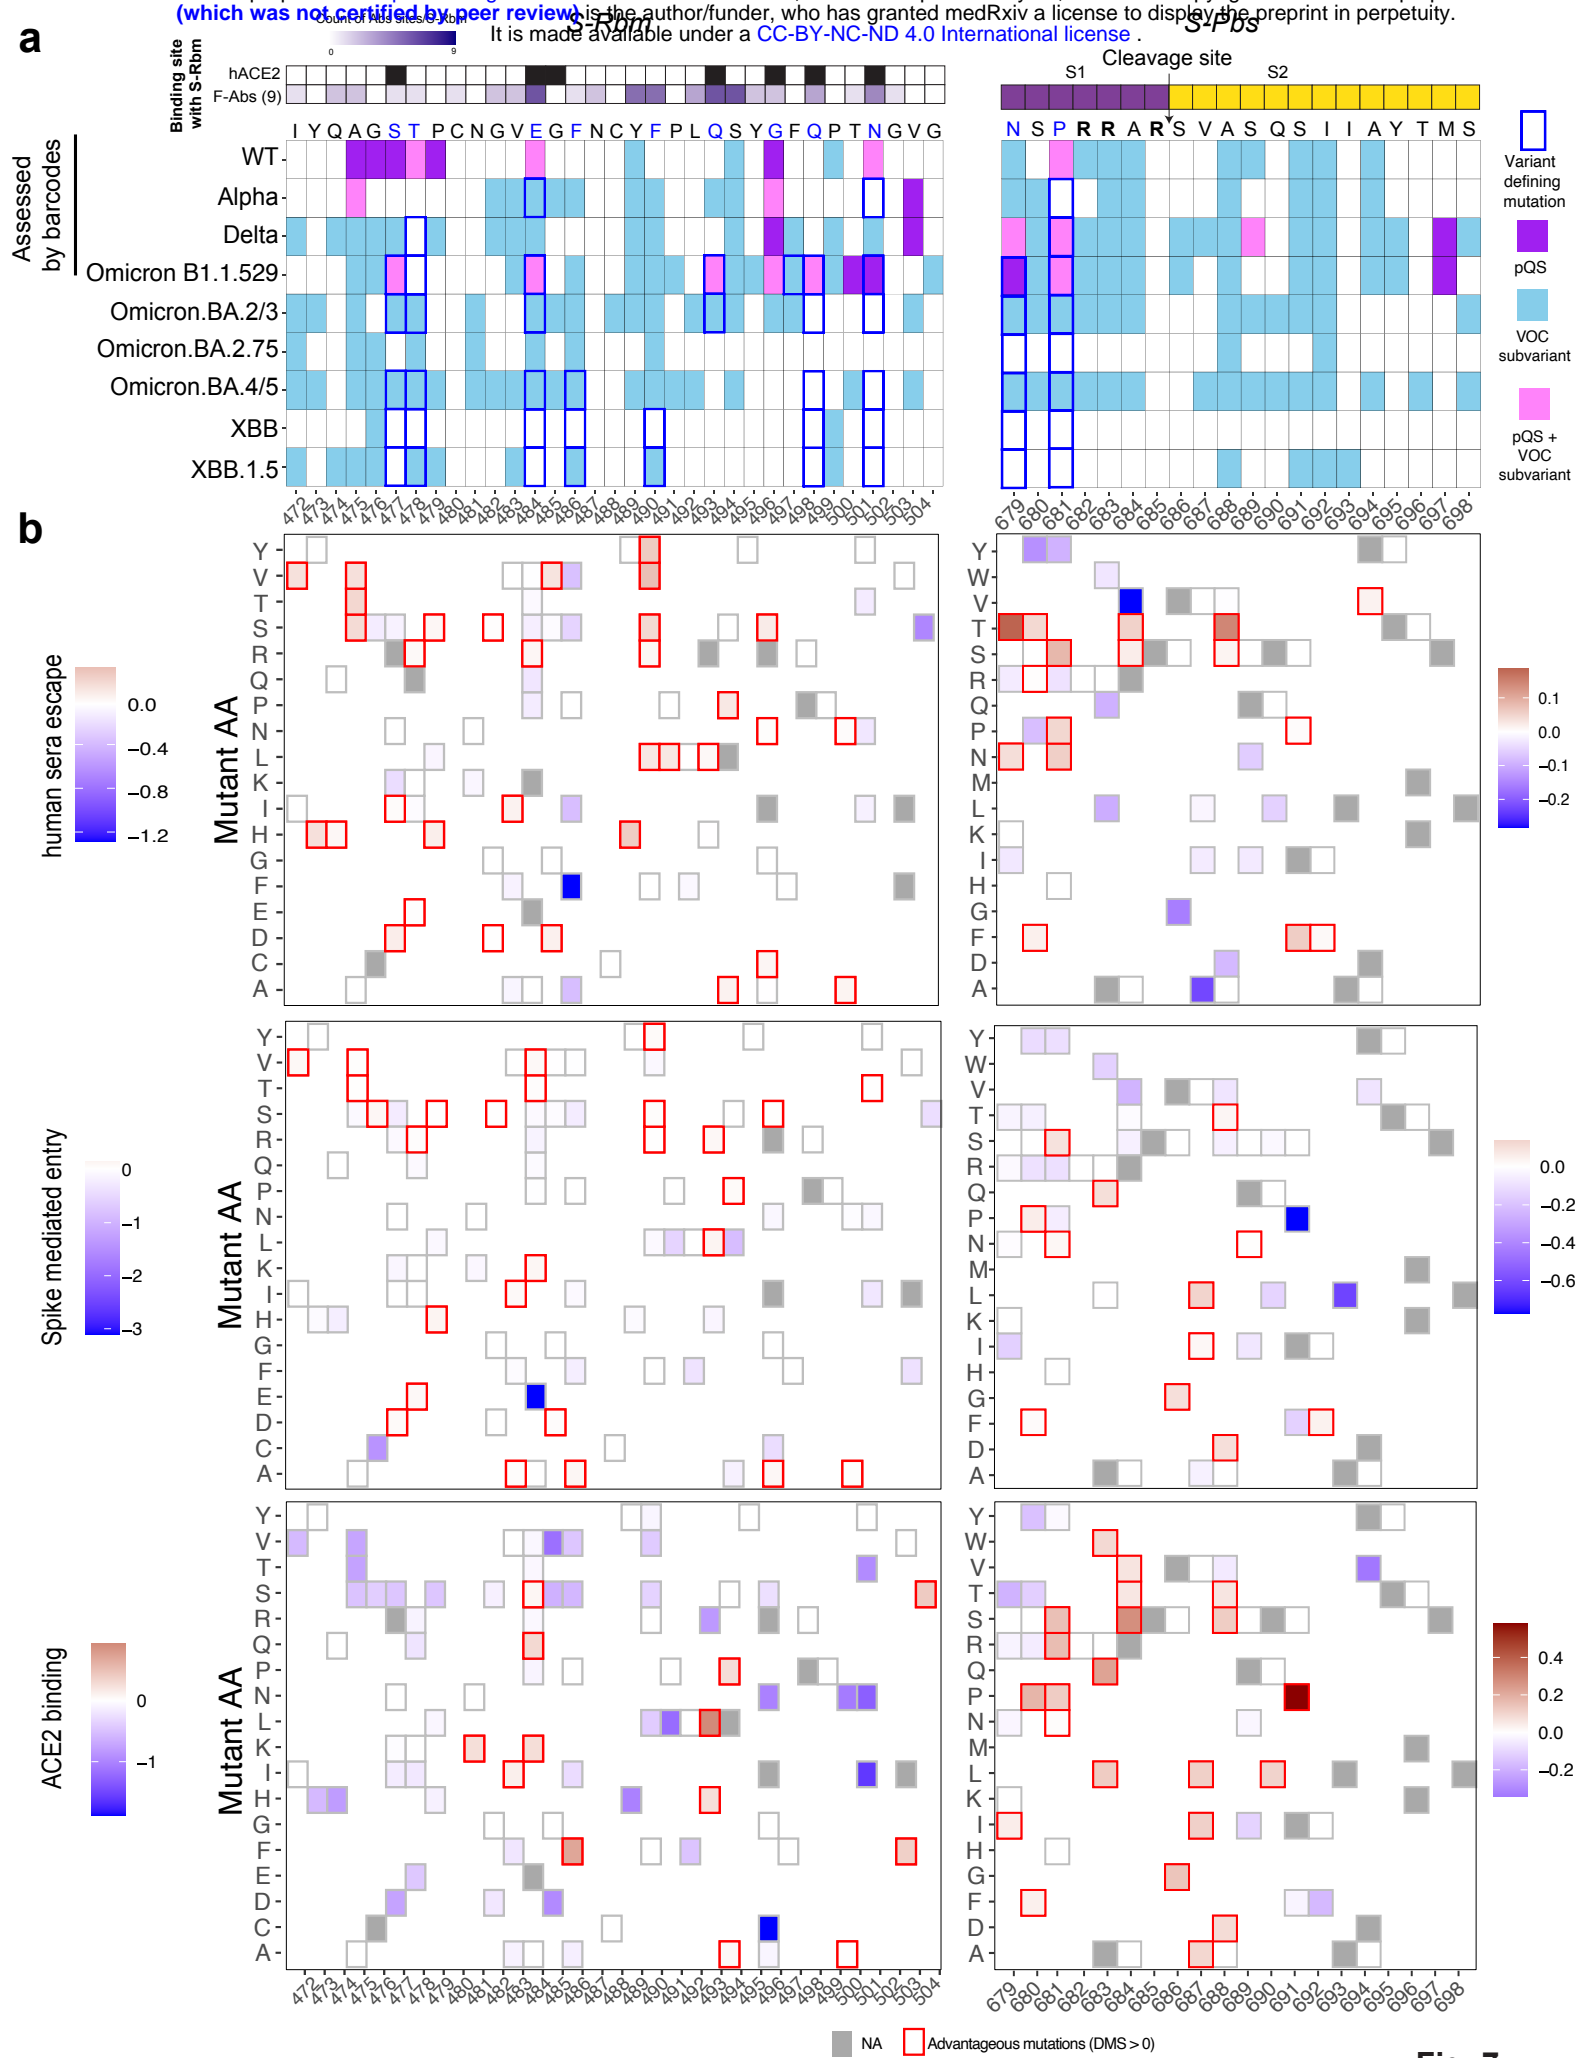

Fig. 7
